# Large-Scale Sparse Regression for Multiple Responses with Applications to UK Biobank

Junyang Qian<sup>1</sup>, Yosuke Tanigawa<sup>2</sup>, Ruilin Li<sup>3</sup>,  
Robert Tibshirani<sup>1,2</sup>, Manuel A. Rivas<sup>\*2</sup> and Trevor Hastie<sup>†1,2</sup>

<sup>1</sup>Department of Statistics, Stanford University

<sup>2</sup>Department of Biomedical Data Science, Stanford University

<sup>3</sup>Institute for Computational and Mathematical Engineering, Stanford University

## Abstract

In high-dimensional regression problems, often a relatively small subset of the features are relevant for predicting the outcome, and methods that impose sparsity on the solution are popular. When multiple correlated outcomes are available (multitask), reduced rank regression is an effective way to borrow strength and capture latent structures that underlie the data. Our proposal is motivated by the UK Biobank population-based cohort study, where we are faced with large-scale, ultrahigh-dimensional features, and have access to a large number of outcomes (phenotypes): lifestyle measures, biomarkers, and disease outcomes. We are hence led to fit sparse reduced-rank regression models, using computational strategies that allow us to scale to problems of this size. We use an iterative algorithm that alternates between solving the sparse regression problem and solving the reduced rank decomposition. For the sparse regression component, we propose a scalable iterative algorithm based on adaptive screening that leverages the sparsity assumption and enables us to focus on solving much smaller sub-problems. The full solution is reconstructed and tested via an optimality condition to make sure it is a valid solution for the original problem. We further extend the method to cope with practical issues such as the inclusion of confounding variables and imputation of missing values among the phenotypes. Experiments on both synthetic data and the UK Biobank data demonstrate the effectiveness of the method and the algorithm. We present `multiSnynet` package, available at <http://github.com/junyangq/multiSnynet> that works on top of PLINK2 files, which we anticipate to be a valuable tool for generating polygenic risk scores from human genetic studies.

## Contents

|          |                                                          |          |
|----------|----------------------------------------------------------|----------|
| <b>1</b> | <b>Introduction</b>                                      | <b>3</b> |
| 1.1      | Reduced-Rank Regression for Multiple Responses . . . . . | 4        |
| 1.2      | Sparse Models in High-Dimensional Problems . . . . .     | 6        |

\*Corresponding author: [mrivas@stanford.edu](mailto:mrivas@stanford.edu)

†Corresponding author: [hastie@stanford.edu](mailto:hastie@stanford.edu)

|    |                                                                             |           |
|----|-----------------------------------------------------------------------------|-----------|
| 33 | <b>2 Sparse Reduced-Rank Regression</b>                                     | <b>6</b>  |
| 34 | <b>3 Fast Algorithms for Large-Scale and Ultrahigh-Dimensional Problems</b> | <b>7</b>  |
| 35 | 3.1 Alternating Minimization . . . . .                                      | 7         |
| 36 | 3.2 Variable Screening for Ultrahigh-Dimensional Problems . . . . .         | 8         |
| 37 | 3.2.1 Screening Strategies . . . . .                                        | 9         |
| 38 | 3.2.2 Optimality Condition . . . . .                                        | 10        |
| 39 | 3.3 Computational Considerations . . . . .                                  | 11        |
| 40 | 3.3.1 Initialization and Warm Start . . . . .                               | 11        |
| 41 | 3.3.2 Early Stopping . . . . .                                              | 12        |
| 42 | 3.4 Extensions . . . . .                                                    | 12        |
| 43 | 3.4.1 Standardization . . . . .                                             | 12        |
| 44 | 3.4.2 Weighting . . . . .                                                   | 12        |
| 45 | 3.4.3 Adjustment Covariates . . . . .                                       | 13        |
| 46 | 3.4.4 Missing Values . . . . .                                              | 14        |
| 47 | 3.4.5 Lazy Reduced Rank Regression . . . . .                                | 15        |
| 48 | 3.5 Full Algorithm . . . . .                                                | 15        |
| 49 | <b>4 Convergence Analysis</b>                                               | <b>17</b> |
| 50 | <b>5 Simulation Studies</b>                                                 | <b>18</b> |
| 51 | <b>6 Real Data Application: UK Biobank</b>                                  | <b>19</b> |
| 52 | 6.1 Asthma and 7 Blood Biomarkers . . . . .                                 | 21        |
| 53 | 6.2 35 Biomarkers . . . . .                                                 | 22        |
| 54 | <b>7 Related Work</b>                                                       | <b>25</b> |
| 55 | <b>8 Summary and Discussion</b>                                             | <b>26</b> |
| 56 | <b>References</b>                                                           | <b>27</b> |
| 57 | <b>A Additional Proofs</b>                                                  | <b>32</b> |
| 58 | A.1 Proof of Lemma 1 . . . . .                                              | 32        |
| 59 | A.2 Proof of Lemma 2 . . . . .                                              | 32        |
| 60 | A.3 Proof of Theorem 2 . . . . .                                            | 32        |
| 61 | <b>B Connection with CCA</b>                                                | <b>33</b> |
| 62 | <b>C Additional Experiments</b>                                             | <b>34</b> |
| 63 | <b>D Additional Information on the Methods</b>                              | <b>39</b> |
| 64 | D.1 Compliance with ethical regulations and informed consent . . . . .      | 39        |
| 65 | D.2 Population stratification in UK Biobank . . . . .                       | 40        |
| 66 | D.3 Variant annotation and quality control . . . . .                        | 40        |

## 1 Introduction

The past two decades have witnessed rapid growth in the amount of data available to us. Many areas such as genomics, neuroscience, economics and Internet services have been producing increasingly larger datasets that have high dimension, large sample size, or both. A variety of statistical methods and computational tools have been developed to accommodate this change so that we are able to extract valuable information and insight from these massive datasets (Hastie et al., 2009; Efron, Hastie, 2016; Dean, Ghemawat, 2008; Zaharia et al., 2010; Abadi et al., 2016).

One major motivating application for this work is the study of data from population-scale cohorts like UK Biobank with genetic data from over one million genetic variants and phenotype data from thousands of phenotypes in over 500,000 individuals (Bycroft et al., 2018). These data present unprecedented opportunities to explore very comprehensive genetic relationships with phenotypes of interest. In particular, the subset of tasks we are interested in is the prediction of a person's phenotype value, such as disease affection status, based on his or her genetic variants.

Genome-wide association studies (GWAS) is a very powerful and widely used framework for identifying genetic variants that are associated with a given phenotype. See, for example, Visscher et al. (2017) and the references therein. It is based on the results of univariate marginal regression over all candidate variants and tries to find a subset of significant ones. While being computationally efficient and easy to interpret, GWAS has fairly limited prediction performance because at most one predictor can present in the model. If prediction performance is our main concern, it is natural to consider the class of multivariate methods, i.e. that which considers multiple variants simultaneously. In the past, *wide* data were prevalent where only a limited number, like thousands, of samples were available. In this regime, some sophisticated multivariate methods could be applicable, though they have to more or less deal with dimension reduction or variable selection. In this setting, we handle hundreds of thousands samples and even more variables. In such cases, statistical methods and computational algorithms become equally important because only efficient algorithmic design will allow for the application of sophisticated statistical modeling. Recently, we introduced some algorithms addressing these challenges. In particular, Qian et al. (2019) proposed an iterative screening framework that is able to fit the exact lasso/elastic-net solution path in large-scale and ultrahigh-dimensional settings, and demonstrate competitive computational efficiency and superior prediction performance over previous methods.

In this paper, we consider the scenarios where multivariate responses are available in addition to the multiple predictors, and propose a suite of statistical methods and efficient algorithms that allow us to further improve the statistical performance in this large  $n$  and large  $p$  regime. Some characteristics we want to leverage and challenges we want to solve include:

**Statistics** There are thousands of phenotypes available in the UK Biobank. Many of them are highly correlated with each other and can have a lot of overlap in their driving factors. By treating them separately, we lose this information that could have been used to stabilize our model estimation. The benefit of building a joint model can be seen from the following simplified model. Suppose all the outcomes  $\mathbf{y}^k, k = 1, \dots, q$  are independent noisy observations of a shared factor  $\mathbf{u} = \mathbf{X}\beta$  such that  $\mathbf{y}^k = \mathbf{u} + \mathbf{e}^k$ . It is easy to see that by taking an average across all the outcomes, we obtain a less noisy response  $\bar{\mathbf{y}}$ , and this will give us more accurate parameter estimation and better prediction than the model built on any of the single outcome. The assumption of such latent structure is an important approach to capturing the correlation structure among the outcomes and can bring in a significant reduction in variance if the data indeed behave in a similar way. We will

111 formalize this belief and build a model on top of it. In addition, in the presence of high-dimensional  
112 features, we will follow the “bet on sparsity” principle (Hastie et al., 2009), and assume that only  
113 a subset of the predictors are relevant to the prediction.

114 Therefore, the statistical model we will build features two major assumptions: **low-rank** in the  
115 signal and **sparse effect**. Furthermore, we will introduce integrated steps to systematically deal  
116 with confounders and missing values.

117 **Computation** On a large-scale dataset, building a multivariate model can pose great computa-  
118 tional challenges. For example, loading the entire UK Biobank dataset into memory with double  
119 precision will take more than one terabyte of space, while typically most existing statistical com-  
120 puting tools assume that the data are already sitting in memory. Even if large memory is available,  
121 one can always encounter data or construct features so that it becomes insufficient. Hence, instead  
122 of expecting sufficient memory space, we would like to find a scalable solution that is less restricted  
123 by the size of physical memory.

124 There is a dynamic data access mechanism provided by the operating system called memory  
125 mapping (Bovet, Cesati, 2005) that allows for easy access to larger-than-memory data on the disk.  
126 In essence, it carries a chunk of data from disk to memory when needed and swap some old chunks  
127 of data out of memory when it is full. In principle, we could add a layer of memory mapping on  
128 top of all the procedures and then access the data as if they were in memory. However, there is  
129 one important practical component that should never be ignored: disk I/O. This is known to be  
130 expensive in the operating system and can greatly delay the computation if frequent disk I/Os are  
131 involved. For this reason, we do not pursue first-order gradient-based methods such as stochastic  
132 gradient descent (Bottou, 2010) or dual averaging (Xiao, 2010; Duchi et al., 2011) because it can  
133 take a large number of passes over the data for the objective function to converge to the optimum.

134 To address this, we design the algorithm so that it needs as few full passes over the data as  
135 possible while solving the exact objective. In particular, by leveraging the sparsity assumption,  
136 we propose an adaptive screening approach that allows us to strategically select a small subset of  
137 variables into memory, do intensive computation on the subset, and then verify the validity of all  
138 the left-out variables. The last step is important because we want to guarantee that the solution  
139 obtained from the algorithm is a valid solution to the original full problem.

## 140 1.1 Reduced-Rank Regression for Multiple Responses

In the standard multivariate linear regression model, given a model matrix  $\mathbf{X} = (\mathbf{x}_1, \dots, \mathbf{x}_p) \in \mathbb{R}^{n \times p}$   
and a multivariate response matrix  $\mathbf{Y} = (\mathbf{y}_1, \dots, \mathbf{y}_q) \in \mathbb{R}^{n \times q}$ , we assume that

$$\mathbf{Y} = \mathbf{X}\mathbf{B} + \mathbf{E},$$

141 where each row of  $\mathbf{E} = (\mathbf{e}_1, \dots, \mathbf{e}_q)$  is assumed to be an independent sample from some multivariate  
142 Gaussian distribution  $\mathbf{E}^{(i)} \stackrel{\text{iid}}{\sim} \mathcal{N}(0, \Sigma_E)$ . When  $n \geq q$ , it is easy to see that a maximum likelihood  
143 estimator (MLE) can be found by solving a least squares problem with multiple outcomes, i.e.

$$\hat{\mathbf{B}} \in \underset{\mathbf{B} \in \mathbb{R}^{p \times q}}{\operatorname{argmin}} \frac{1}{2} \|\mathbf{Y} - \mathbf{X}\mathbf{B}\|_F^2, \quad (1)$$

144 where  $\|\mathbf{A}\|_F^2 = \sum_{i=1}^n \sum_{j=1}^m \mathbf{A}_{ij}^2$  is the squared Frobenius norm of a matrix  $\mathbf{A} \in \mathbb{R}^{n \times m}$ . When  $n \geq p$   
145 and  $\mathbf{X}$  has full rank, (1) has the closed-form solution  $\hat{\mathbf{B}} = (\mathbf{X}^\top \mathbf{X})^{-1} \mathbf{X}^\top \mathbf{Y}$ . Notice that this is

146 equivalent to solving  $q$  single-response regression problems separately.

147

However, in many scenarios, there can be some correlation structure in the signals that we can capture to improve the statistical efficiency of the estimator. One approach to modeling the correlation is to assume that there is a set of latent factors that act as the drivers for all the outcomes. When we assume that the dependencies of the latent factors on the raw features and the outcomes on the latent factors are both linear, it is equivalent to making a low-rank assumption on the coefficient matrix. Reduced-rank regression (Anderson, 1951, hereafter RRR) assumes that the coefficient matrix  $\mathbf{B}$  has a fixed rank  $r \leq \min(p, q)$ , or

$$\mathbf{B} = \mathbf{U}\mathbf{V}^\top,$$

148 where  $\mathbf{U} = (\mathbf{u}_1, \dots, \mathbf{u}_r) \in \mathbb{R}^{p \times r}$ ,  $\mathbf{V} = (\mathbf{v}_1, \dots, \mathbf{v}_q)^\top \in \mathbb{R}^{q \times r}$ .<sup>1</sup> With the decomposed coefficient  
 149 matrices, an alternative way to express the multivariate model is to assume that there exists a set  
 150 of latent factors  $\{\mathbf{z}_\ell \in \mathbb{R}^n : 1 \leq \ell \leq r\}$  such that for each  $\ell$ ,

$$\begin{aligned} \mathbf{z}_\ell &= \mathbf{X}\mathbf{u}_\ell, \\ \mathbf{y}_k &= \mathbf{Z}\mathbf{v}_k + \mathbf{e}_k. \end{aligned}$$

151 Figure 1 gives a visualization of the dependency structure described above. It can also be seen as a a  
 152 multilayer perceptron (MLP) with linear activation and one hidden layer, or multitask learning with  
 153 bottleneck. We notice that under the decomposition, the parameters are not identifiable. In fact, if  
 154 we apply any nonsingular linear transformation  $\mathbf{M} \in \mathbb{R}^{r \times r}$  such that  $\mathbf{V}' = \mathbf{V}\mathbf{M}^\top$  and  $\mathbf{U}' = \mathbf{U}\mathbf{M}^{-1}$ ,  
 155 it yields the same model but different parameters. As a result, we also have an infinite number of  
 156 MLEs.

157 Under the rank constraint, an explicit global solution can be obtained. Let  $\mathbf{M}\mathbf{D}\mathbf{N}^\top$  be the singular  
 158 value decomposition (SVD) of  $(\mathbf{X}^\top\mathbf{X})^{-\frac{1}{2}}\mathbf{X}^\top\mathbf{Y}$ , a set of solution is given by  $\hat{\mathbf{U}} = (\mathbf{X}^\top\mathbf{X})^{-1}\mathbf{X}^\top\mathbf{Y}\mathbf{N}$ ,  
 159  $\hat{\mathbf{V}} = \mathbf{N}$ . Velu, Reinsel (2013) has a comprehensive discussion on the model under classical large  $n$   
 160 settings.

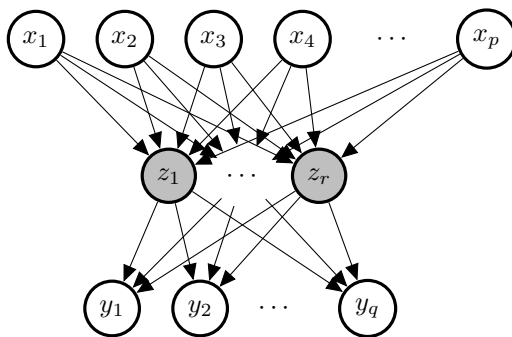

**Figure 1:** Diagram of the reduced rank regression. The nodes in grey are latent variables. The arrows represent the dependency structure. Known as *multitask* learning in the machine learning community.

<sup>1</sup>We use  $\mathbf{v}_k^\top$  to represent the  $k$ th row of  $\mathbf{V}$  for convenience.

## 1.2 Sparse Models in High-Dimensional Problems

In the setting of high-dimensional problems where  $p > n$ , the original low-rank coefficient matrix  $\mathbf{B}$  can be unidentifiable. Often sparsity is assumed in the coefficients to model the belief that only a subset of the features are relevant to the outcomes. To find such a sparse estimate of the coefficients, a widely used approach is to add an appropriate non-smooth penalty to the original objective function to encourage the desired sparsity structure. Common choices include the lasso penalty (Tibshirani, 1996), the elastic-net penalty (Zou, Hastie, 2005) or the group lasso penalty (Yuan, Lin, 2006). There has been a great amount of work studying the consistency of estimation and model selection under such settings. See Greenshtein, Ritov (2004); Meinshausen, Bühlmann (2006); Zhao, Yu (2006); Bach (2008); Wainwright (2009); Bickel et al. (2009); Obozinski et al. (2011); Bühlmann, Van De Geer (2011) and references therein. In particular, the group lasso, as the name suggests, encourages group-level sparsity induced by the following penalty term:

$$P_g(\beta) = \sum_{j=1}^J \|\beta_j\|_2,$$

where  $\beta_j \in \mathbb{R}^{p_j}$  is the subvector corresponding the  $j$ th group of variables and  $\|\beta_j\|_2 = \sqrt{\sum_{\ell=1}^{p_j} \beta_{j,\ell}^2}$  is the vector  $\ell_2$ -norm. The  $\ell_2$ -norm enforces that if the fitted model has  $\|\hat{\beta}_j\|_2 = 0$ , all the elements in  $\hat{\beta}_j$  will be 0, and otherwise with probability one all the elements will be nonzero. This yields a desired group-level selection in many applications. Throughout the paper, we will adopt the group lasso penalty, defining each predictor's coefficients across all outcomes as a distinct group, in order to achieve homogeneous sparsity across multiple outcomes. In addition to variable selection for better prediction and interpretation, we will also see the computational advantages we leverage to develop an efficient algorithm.

## 2 Sparse Reduced-Rank Regression

Given a rank  $r$ , we are going to solve the following penalized rank-constrained optimization problem:

$$\begin{aligned} \text{minimize} \quad & \frac{1}{2} \|\mathbf{Y} - \mathbf{X}\mathbf{B}\|_F^2 + \lambda \sum_{j=1}^p \|\mathbf{B}_{j\cdot}\|_2, \\ \text{s.t.} \quad & \text{rank}(\mathbf{B}) \leq r. \end{aligned} \tag{2}$$

Alternatively, we can decompose the matrix explicitly as  $\mathbf{B} = \mathbf{U}\mathbf{V}^\top$  where  $\mathbf{U} \in \mathbb{R}^{p \times r}$ ,  $\mathbf{V} \in \mathbb{R}^{q \times r}$ . It can be shown that the problem above is equivalent to the Sparse Reduced Rank Regression (SRRR) proposed by Chen, Huang (2012):

$$\begin{aligned} \text{minimize} \quad & \frac{1}{2} \|\mathbf{Y} - \mathbf{X}\mathbf{U}\mathbf{V}^\top\|_F^2 + \lambda \sum_{j=1}^p \|\mathbf{U}_{j\cdot}\|_2, \\ \text{s.t.} \quad & \mathbf{V}^\top \mathbf{V} = \mathbf{I}. \end{aligned} \tag{3}$$

Alternating minimization was proposed by Chen, Huang (2012) to solve this non-convex optimization problem, where two algorithms were considered: subgradient descent and a variational method.

177 The subgradient method was shown to be faster when  $p \gg n$  and the variational method faster  
 178 when  $n \gg p$ . However, in each iteration, the computational complexity of either method is at  
 179 least quadratic in the number of variables  $p$ . It makes the problem almost intractable in ultrahigh-  
 180 dimensional problems, which is common, for example, in modern genetic studies. Moreover, to  
 181 obtain a model with good prediction performance, we are interested in solving the problem over  
 182 multiple  $\lambda$ 's rather than a single one. For such purposes, we design a path algorithm with adaptive  
 183 variable screening that will be both memory and computationally efficient.

### 184 3 Fast Algorithms for Large-Scale and Ultrahigh-Dimensional 185 Problems

186 First, we present a naive version of the path solution, which will be the basis of our subsequent  
 187 development. The path is defined on a decreasing sequence of  $\lambda$  values  $\lambda_{\max} = \lambda_1 > \lambda_2 > \dots >$   
 188  $\lambda_L \geq 0$ , where  $\lambda_{\max}$  is often defined by one that leads to the trivial (e.g. all zero) solution and the  
 189 rest are often determined by an equally spaced array on the log scale. In particular, for Problem  
 190 (2), we are able to figure out the exact lower bound of  $\lambda_{\max}$  for which the solution is trivial.

**Lemma 1.** *In problem (2), if  $r > 0$ , the maximum  $\lambda$  that results in a nontrivial solution  $\hat{B}(\lambda)$  is*

$$\lambda_{\max} = \max_{1 \leq j \leq p} \|\mathbf{x}_j^\top \mathbf{Y}\|_2.$$

191 The proof is straightforward, which is a result of the Karush–Kuhn–Tucker (KKT) condition  
 192 (See Boyd et al. (2004) for more details). We present the full argument in Appendix A.1. The  
 193 naive path algorithm tries to solve the problem independently across different  $\lambda$  values.

#### 194 3.1 Alternating Minimization

195 The algorithm is described in Algorithm 1. For each  $\lambda$  value, it applies alternating minimization  
 196 to Problem (3) till convergence.

197 In the V-step (4), we will be solving the orthogonal Procrustes problem given a fixed  $\mathbf{U}^{(k)}$ .  
 198 An explicit solution can be constructed from the singular value decomposition, as detailed in the  
 199 following Lemma.

**Lemma 2.** *Suppose  $p \geq r$  and  $\mathbf{Z} \in \mathbb{R}^{p \times r}$ . Let  $\mathbf{Z} = \mathbf{M}\mathbf{D}\mathbf{N}^\top$  be its (skinny) singular value decom-  
 position, where  $\mathbf{M} \in \mathbb{R}^{p \times r}$ ,  $\mathbf{D} = \mathbb{R}^{r \times r}$  and  $\mathbf{N} \in \mathbb{R}^{r \times r}$ . An optimal solution to*

$$\underset{\mathbf{V}: \mathbf{V}^\top \mathbf{V} = \mathbf{I}}{\text{maximize}} \text{Tr}(\mathbf{Z}^\top \mathbf{V})$$

200 *is given by  $\hat{\mathbf{V}} = \mathbf{M}\mathbf{N}^\top$ , and the objective function has optimal value  $\|\mathbf{Z}\|_*$ , the nuclear norm of  $\mathbf{Z}$ .*

201 *Proof.* See in Appendix A.2. □

202 To analyze the computational complexity of the algorithm, we see a one-time computation of  
 203  $\mathbf{Y}^\top \mathbf{X}$  that costs  $O(npq)$ . In each iteration, there is  $O(pqr)$  complexity for the matrix multiplication  
 204  $\mathbf{Y}^\top \mathbf{X}\mathbf{U}^{(k)}$  and  $O(qr^2)$  for computing the SVD and the final solution. Therefore, the per-iteration  
 205 computational complexity for the V-step is  $O(pqr + qr^2)$ , or  $O(pqr)$  when  $p \gg q$ .

---

**Algorithm 1** Alternating Minimization

---

- 1: Define a sequence of  $\lambda$  values  $\lambda_1 > \dots > \lambda_L \geq 0$ .
- 2: **for**  $\ell = 1$  **to**  $L$  **do**
- 3:   Let  $k = 0$ , and initialize  $\mathbf{U}^{(0)}, \mathbf{V}^{(0)}$ .
- 4:   **while**  $k = 0$  **or**  $\|\mathbf{U}^{(k)}\mathbf{V}^{(k)\top} - \mathbf{U}^{(k-1)}\mathbf{V}^{(k-1)\top}\| > \epsilon$  **do**
- 5:     **V-step:** Fix  $\mathbf{U}^{(k)}$ , solve  $\mathbf{V}$ : the orthogonal Procrustes problem

$$\underset{\mathbf{V}: \mathbf{V}^\top \mathbf{V} = \mathbf{I}}{\text{minimize}} \|\mathbf{Y} - \mathbf{X}\mathbf{U}^{(k)}\mathbf{V}^\top\|_F^2. \quad (4)$$

- Let  $\mathbf{Y}^\top \mathbf{X}\mathbf{U}^{(k)} = \mathbf{M}\mathbf{D}\mathbf{N}^\top$  (skinny SVD) and solve  $\mathbf{V}^{(k+1)} = \mathbf{M}\mathbf{N}^\top$ .
- 6:     **U-step:** Fix  $\mathbf{V}^{(k+1)}$ , solve  $\mathbf{U}$ : the group lasso problem

$$\underset{\mathbf{U}}{\text{minimize}} \frac{1}{2} \|\mathbf{Y}\mathbf{V}^{(k+1)} - \mathbf{X}\mathbf{U}\|_F^2 + \lambda_\ell \sum_{j=1}^p \|\mathbf{U}_j\|_2. \quad (5)$$

- 7:      $k = k + 1$
  - 8:   **end while**
  - 9: **end for**
- 

206     In the U-step, we are solving a group lasso problem. Computing  $\mathbf{Y}\mathbf{V}^{(k+1)}$  takes  $O(nqr)$  time.  
 207     The group-lasso problem can be solved by **glmnet** (Friedman et al., 2010) with the **mgaussian**  
 208     family. With coordinate descent, its complexity is  $O(\tilde{k}pqn)$ , where  $\tilde{k}$  is the number of iterations  
 209     until convergence and is expected to be small with a reasonable initialization, for example, provided  
 210     by warm start. Thus, the per-iteration complexity for the U-step is  $O(nqr + \tilde{k}npq)$ , which is  $O(\tilde{k}pqn)$   
 211     when  $p \gg r$ .

212     Therefore, the overall computational complexity scales at least linearly with the number of  
 213     features, and will have a large multiplier if the sample size is large as well. While subsampling  
 214     can effectively reduce the computational cost, in high-dimensional settings, it is critical to have  
 215     sufficient samples for the quality of estimation. Instead, we seek for computational techniques that  
 216     can lower the actual number of features involved in expensive iterative computation without giving  
 217     up any statistical efficiency. Thanks to the induced sparsity by the objective function, we are able  
 218     to achieve it by variable screening.

### 219 3.2 Variable Screening for Ultrahigh-Dimensional Problems

220     In this section, we discuss strategic ways to find a good subset of variables to focus on in the  
 221     computation that would allow us to reconstruct the full solution easily. In particular, we would like  
 222     to iterate through the following steps for each  $\lambda$ :

- 223     1. **Screen** a strong set  $S$  and treat all the left-out variables  $S^c$  as null variables that potentially  
 224       have zero coefficients;
- 225     2. **Solve** a significantly smaller problem on the subset of variables  $S$ ;
- 226     3. **Check** an optimality condition to guarantee the constructed full solution  $\hat{\mathbf{B}} = (\hat{\mathbf{B}}_S, \hat{\mathbf{B}}_{S^c})$  with



227  $\hat{\mathbf{B}}_{S^c} = 0$  is indeed a valid solution to the original problem. If the condition is not satisfied,  
 228 go back to the first step with an expanded set  $S$ .

### 229 3.2.1 Screening Strategies

230 We have seen Lemma 1 that determines the entry point of any nonzero coefficient on the solution  
 231 path. Furthermore, there is evidence that the variables entering the model (as one decreases the  $\lambda$   
 232 value) tend to have large values by this criterion. Tibshirani et al. (2012) developed on this idea  
 233 and proposed the strong rules as a sequential variable screening mechanism. The strong rules state  
 234 that in a standard lasso problem with the model matrix  $\mathbf{X} = (\mathbf{x}_1, \dots, \mathbf{x}_p) \in \mathbb{R}^{n \times p}$  and a single  
 235 response  $\mathbf{y} \in \mathbb{R}^n$ , assume  $\hat{\beta}(\lambda_{k-1})$  is the lasso solution at  $\lambda_{k-1}$ , then the  $j$ th predictor is discarded  
 236 at  $\lambda_k$  if

$$|\mathbf{x}_j^\top (\mathbf{y} - \mathbf{X}\hat{\beta}(\lambda_{k-1}))| < \lambda_k - (\lambda_{k-1} - \lambda_k). \quad (6)$$

237 The key idea is that the inner product above is almost “non-expansive” in terms of  $\lambda$ . As a result,  
 238 the KKT condition suggests that the variables to be discarded by (6) would have coefficient 0 at  
 239  $\lambda_k$ . However it is not a guarantee. The strong rules can fail, though failures occur rarely when  
 240  $p > n$ . In any case, the KKT condition is checked to ensure the exact solution is found. Although  
 241 Tibshirani et al. (2012) focused mostly on the lasso-type problem, they also suggested extension to  
 242 general objective functions and penalties. For general objective function  $f(\beta)$  with  $p_j$ -norm penalty  
 243  $\|\beta_j\|_{p_j}$  for the  $j$ th group, the screening criterion will be based on the dual norm of its gradient  
 244  $\|\nabla_j f(\beta)\|_{q_j}$  where  $1/p_j + 1/q_j = 1$ .

245 Inspired by the general strong rules, we propose three sequential screening strategies for the  
 246 sparse reduced rank objective (3), named after their respective characteristics: Multi-Gaussian,  
 247 Rank-Less and Fix-V. They are based either on the solution of a relaxed convex problem at the  
 248 same  $\lambda_k$  or on the exact solution at the previous  $\lambda_{k-1}$ .

- 249 • (Multi-Gaussian) Solve the full-rank convex problem at  $\lambda_k$  and use its active set as the candi-  
 250 dates for the low-rank settings. The main advantage is that the screening is always stable due  
 251 to the convexity. However this approach often overselects and brings extra burden to the com-  
 252 putation. By assuming a higher rank than necessary, the effective number of responses would  
 253 become more than that of a low-rank model. As a result, more variables would potentially  
 254 be needed to serve for an enlarged set of responses.
- 255 • (Rank-Less) Find variables that have large  $c_j = \|\mathbf{X}_j^\top (\mathbf{Y} - \mathbf{X}\mathbf{U}(\lambda_{k-1})\mathbf{V}(\lambda_{k-1})^\top)\|_2$ . This is  
 256 analogous to the strong rules applied to the vanilla multi-response lasso ignoring the rank  
 257 constraint.
- 258 • (Fix-V) Find variables that have large  $c'_j = \|\mathbf{X}_j^\top (\mathbf{Y}\mathbf{V}(\lambda_{k-1}) - \mathbf{X}\mathbf{U}(\lambda_{k-1}))\|_2$ . This is similar  
 259 to the strong rules applied in the  $\mathbf{U}$ -step with  $\mathbf{V}$  assumed fixed. To see the rationale better,  
 260 we take another perspective. The squared error in SRRR (3) can also be written as

$$\|\mathbf{Y} - \mathbf{X}\mathbf{U}\mathbf{V}^\top\|_F^2 = \mathbf{Tr}(\mathbf{Y}^\top \mathbf{Y}) - 2\mathbf{Tr}(\mathbf{Y}^\top \mathbf{X}\mathbf{U}\mathbf{V}^\top) + \mathbf{Tr}(\mathbf{X}\mathbf{U}\mathbf{V}^\top \mathbf{V}\mathbf{U}^\top \mathbf{X}^\top)$$

Since  $\mathbf{V}^\top \mathbf{V} = \mathbf{I}$ , the optimization problem becomes

$$\underset{\mathbf{U}, \mathbf{V}: \mathbf{V}^\top \mathbf{V} = \mathbf{I}}{\text{minimize}} \frac{1}{2} \|\mathbf{X}\mathbf{U}\|_F^2 - \mathbf{Tr}(\mathbf{Y}^\top \mathbf{X}\mathbf{U}\mathbf{V}^\top) + \lambda \sum_{j=1}^p \|\mathbf{U}_j\|_2$$

For any given  $\mathbf{U}$ , we can solve  $\mathbf{V} = \mathbf{M}\mathbf{N}^\top$ , where  $\mathbf{Y}^\top \mathbf{X}\mathbf{B} = \mathbf{M}\mathbf{D}\mathbf{N}^\top$  is its singular value decomposition. Let  $f(\mathbf{U}) = \frac{1}{2}\|\mathbf{X}\mathbf{U}\|_F^2 - \|\mathbf{Y}^\top \mathbf{X}\mathbf{U}\|_*$ . The problem is reduced to

$$\underset{\mathbf{U}}{\text{minimize}} f(\mathbf{U}) + \lambda \sum_{j=1}^p \|\mathbf{U}_{j\cdot}\|_2$$

The general strong rule tells us to screen based on the gradient; that is

$$\nabla_{\mathbf{B}} f(\mathbf{B}) = \mathbf{X}^\top \mathbf{X}\mathbf{U} - \mathbf{X}^\top \mathbf{Y}\mathbf{M}\mathbf{N}^\top = \mathbf{X}^\top (\mathbf{X}\mathbf{U} - \mathbf{Y}\mathbf{V}).$$

261 Therefore, the general strong rules endorse the use of this screening rule.

262 We do some experiments to compare the effectiveness of the rules. We simulate the model matrix  
 263 under an independent design and an equi-correlated design with correlation  $\rho = 0.5$ . The true  
 264 solution path is computed using Algorithm 1 with several random initializations and the convex  
 265 relaxation-based initialization (as in the Multi-Gaussian rule). Let  $S(\lambda)$  be the true active set at  
 266  $\lambda$ . For each method  $\ell$  above, we can find, based on either the exact solution at  $\lambda_{k-1}$  or the full-  
 267 rank solution at  $\lambda_k$ , the threshold it needs so that by the screening criterion, the selected subset  
 268  $\hat{S}(\lambda_k)^{(\ell)}$  contains the true subset at  $\lambda_k$ , i.e.  $\hat{S}(\lambda_k|\lambda_{k-1})^{(\ell)} \supseteq S(\lambda_k)$ . This demonstrates how deep  
 269 each method has to search down the variable list to include all necessary variables, and thus how  
 270 accurate the screening mechanism is — the larger the subset size, the worse the method is.

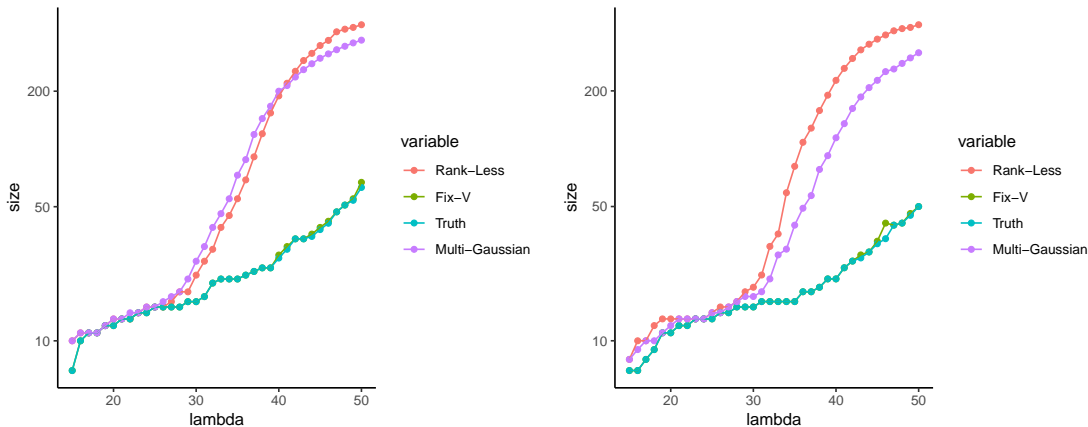

**Figure 2:** Size of screened set under different strategies. Left: independent design. Right: equi-correlated design with  $\rho = 0.5$ . Signal-to-noise ratio (SNR) = 1, and we use the true rank = 3.

271 We see from both plots that the curve of the Fix-V method is able to track that of the exact  
 272 subset fairly well, while the Rank-Less and Multi-Gaussian methods both choose a much larger  
 273 subset in order to cover the subset of active variables in the exact solution. In the rest of the paper,  
 274 we will adopt the Fix-V method to do variable screening.

### 275 3.2.2 Optimality Condition

276 Although the Fix-V method turns out to be most effective in choosing the subset of variables, in  
 277 practice we have no access to the true subset and have to take an estimate. Instead of trying to find

278 a sophisticated threshold, we will do batch screening at a fixed size (this size can change adaptively  
 279 though). Given a size  $K$ , we will take the  $K$  variables that rank the top under this criterion. Clearly  
 280 we can make mistakes by having left out some important variables in the screening stage. In order  
 281 to make sure that our solution is exact rather than approximate in terms of the original problem,  
 282 we need to check the optimality condition and take in more variables when necessary.

283 Suppose we find a solution  $\hat{\mathbf{U}}_S, \hat{\mathbf{V}}_S$  on a subset of variables  $\mathbf{X}_S$  by alternating minimization. We  
 284 will verify the assembled solution  $\hat{\mathbf{U}} = (\hat{\mathbf{U}}_S, \mathbf{0}), \hat{\mathbf{V}} = \hat{\mathbf{V}}_S$  is a limit point of the original optimization  
 285 problem. The argument is supported by the following lemma.

286 **Lemma 3.** *In the U-step (12), given  $\mathbf{V}$  and  $\lambda$ , if we have an exact solution  $\hat{\mathbf{U}}_S$  for the sub-problem  
 287 with  $\mathbf{X}_S$ , then  $\hat{\mathbf{U}} = (\hat{\mathbf{U}}_S, \mathbf{0})$  is a solution to the full problem if and only if for all  $j \in S^c$ ,*

$$\|\mathbf{x}_j^\top (\mathbf{YV} - \mathbf{X}_S \hat{\mathbf{U}}_S)\|_2 \leq \lambda. \quad (7)$$

288 *Proof.* Since this is a convex problem,  $\hat{\mathbf{U}}$  is a solution if and only if  $\mathbf{0} \in \partial f(\hat{\mathbf{U}})$  where  $f$  is the  
 289 objective function in (12) and  $\partial f$  is its subdifferential. For the vector  $\ell_2$ -norm, we know that the  
 290 subdifferential of  $\|\mathbf{x}\|_2$  is  $\{\mathbf{s} \in \mathbb{R}^p : \|\mathbf{s}\|_2 \leq 1\}$  if  $\mathbf{x} = \mathbf{0}$  and  $\{\mathbf{x}/\|\mathbf{x}\|_2\}$  if  $\mathbf{x} \neq \mathbf{0}$ . Notice that  
 291  $\mathbf{X}_S \hat{\mathbf{U}}_S = \mathbf{X} \hat{\mathbf{U}}$  by the definition of  $\hat{\mathbf{U}}$ . Since we have an exact solution on  $S$ , we know  $\mathbf{0} \in \partial f(\hat{\mathbf{U}})_j$   
 292 for all  $j \in S$ . On the other hand, for  $j \in S^c$ ,  $\mathbf{0} \in \partial f(\hat{\mathbf{U}})$  if and only if  $\mathbf{0} \in \{\mathbf{x}_j^\top (\mathbf{X} \hat{\mathbf{U}} - \mathbf{YV}) + \lambda \mathbf{s}_j : \|\mathbf{s}_j\|_2 \leq 1\}$ , which is further equivalent to  $\|\mathbf{x}_j^\top (\mathbf{YV} - \mathbf{X}_S \hat{\mathbf{U}}_S)\|_2 = \|\mathbf{x}_j^\top (\mathbf{YV} - \mathbf{X} \hat{\mathbf{U}})\|_2 \leq \lambda$   $\square$

294 Therefore, once we obtain a solution  $\hat{\mathbf{U}}_S, \hat{\mathbf{V}}_S$  for the sub-problem and get condition (7) verified,  
 295 we know in the V-step, by the lemma above,  $\hat{\mathbf{U}} = (\hat{\mathbf{U}}_S, \mathbf{0})$  is the solution given  $\hat{\mathbf{V}} = \hat{\mathbf{V}}_S$ . In the  
 296 U-step, since  $\mathbf{X} \hat{\mathbf{U}} = \mathbf{X}_S \hat{\mathbf{U}}_S$ ,  $\hat{\mathbf{U}}$  is the solution to the full problem. We see that  $(\hat{\mathbf{U}}, \hat{\mathbf{V}})$  is a limiting  
 297 point of the alternating minimization algorithm for the original problem. However if the condition  
 298 fails, we expand the screened set or bring in the violated variables, and do the fit again. We should  
 299 note that when we say an exact solution to the original problem, we do not claim it to be a local  
 300 minimum or global minimum, unless under some regularity conditions as will be briefly discussed  
 301 later. It is a limiting point of the vanilla alternating minimization algorithm, i.e. Algorithm 1.  
 302 In other words, if we start from the constructed solution (with zero coefficients for the leftout  
 303 variables), the algorithm should converge in one iteration and return the same solution.

304 We have seen the main ingredients of the iterative algorithm: screening, solving and checking.  
 305 Next we discuss some useful practical considerations and extensions.

### 306 3.3 Computational Considerations

#### 307 3.3.1 Initialization and Warm Start

308 Recall that in the training stage our goal is to fit an SRRR solution path across different  $\lambda$  values.  
 309 It is easy to see that with a careful choice of parameterization, the path is continuous in  $\lambda$ . To  
 310 leverage this property, we adopt a warm start strategy. Specifically, we initialize the coefficients of  
 311 the existing variables at  $\lambda_{k+1}$  using the solution at  $\lambda_k$  and zero-initialize the newly added variables.  
 312 With warm start, much less iterations will be needed to converge to the new minimum.

313 However, this by no means guarantees that we are all on a good path. It's likely that we  
 314 are trapped into a neighborhood of local optimum and end up with much higher function value  
 315 than the global minimum. One way to alleviate this, if affordable, is to solve the corresponding  
 316 full-rank problem first, and initialize the coefficients with low-rank approximation of the full-rank

317 solution. We can compare the limiting function values with the warm-start initialization and see  
318 which converges to a better point. Although we didn't use in the actual implementation and  
319 experiments, one could also do random exploration — randomly initialize some of the coefficients,  
320 run the algorithm multiple times and find one that achieves the lowest function value. That said,  
321 we lose the advantage of warm start though. The good news is, in the experiments we have done,  
322 we didn't observe very clear suboptimal behavior by the warm start and full-rank strategies.

### 323 3.3.2 Early Stopping

324 Although we pre-specify a sequence of  $\lambda$  values  $\lambda_1 > \lambda_2 > \dots > \lambda_L$  where we want to fit the SRRR  
325 models, we do not have to fit them all given our goal is to find the best predictive model. Once the  
326 model starts to overfit as we move down the  $\lambda$  list, we can stop our process since the later models  
327 will have no practical use and are expensive to train. Therefore, in the actual computation, we  
328 monitor the validation error along the solution path and call it a stop if it shows a clear upward  
329 trend. One other point we would like to make in this regard is that the validation metric can  
330 be defined either as an average MSE over all phenotypes or a subset of phenotypes we are most  
331 interested in. This is because practically the best  $\lambda$  value can be different for different phenotypes  
332 in the joint model.

## 333 3.4 Extensions

### 334 3.4.1 Standardization

335 We often want to standardize the predictors if they are not on the same scale because the penalty  
336 term is not invariant to change of units of the variables. However we emphasize that some thought  
337 has to be put into this before standardizing the predictors. If the predictors are already on the  
338 same scale, standardizing them could bring unintended advantages to variables with smaller variance  
339 themselves. It is more reasonable not to standardize in such cases.

340 In terms of the outcomes, since they can be at different scales, it is important to standardize  
341 them in the training stage so that no one dominates in the objective function. At prediction (both  
342 training and test time), we scale back to the original levels using their respective variances from  
343 the training set. In fact, the real impact an outcome has to the overall objective is determined by  
344 the proportion of unexplained variance. It would be good to weight the responses properly based  
345 on this if such information is available or can be estimated, e.g. via heritability estimation for  
346 phenotypes in genetic studies.

### 347 3.4.2 Weighting

348 Sometimes we have strong reasons or evidence to prioritize some of the predictors than the oth-  
349 ers. We can easily extend the standard objective (3) and reflect this belief in a weighted penalty  
350  $\lambda \sum_{j=1}^p w_j \|\mathbf{U}_j\|_2$  where the weight  $w_j$  controls inversely the relative importance of the  $j$ th variable.  
351 For example,  $w_j = 0$  implies  $j$ th variable will always be included in the model, while a large  $w_j$  will  
352 almost exclude the variable from the model.

353 In the response space, we can also impose a weighting mechanism to prioritize the training of  
354 certain responses. For a given set of nonnegative weights  $w_k, 1 \leq k \leq q$ , the SRRR objective (3)  
355 can be modified to  $(1/2) \sum_{k=1}^q w_k \|\mathbf{Y}_{\cdot k} - \mathbf{X}\mathbf{U}\mathbf{V}_k^\top\|_2^2 + \lambda \sum_{j=1}^p \|\mathbf{U}_j\|_2$  with the same constraint, or

356 equivalently,

$$\begin{aligned} \text{minimize} \quad & \frac{1}{2} \|\mathbf{Y}\mathbf{W}^{\frac{1}{2}} - \mathbf{X}\mathbf{U}\mathbf{V}^{\top}\|_F^2 + \lambda \sum_{j=1}^p \|\mathbf{U}_{j\cdot}\|_2, \\ \text{s.t.} \quad & \mathbf{V}^{\top}\mathbf{W}^{-1}\mathbf{V} = \mathbf{I}, \end{aligned} \tag{8}$$

357 where the weight matrix  $\mathbf{W} = \mathbf{diag}(w_1, \dots, w_q)$ . To solve the problem with our alternating min-  
 358 imization scheme, we can see that in the V-step, instead of solving the standard orthogonal Pro-  
 359 crustes problem with an elegant analytic solution derived from the SVD, we have to deal with a  
 360 so-called weighted orthogonal Procrustes problem (WOPP). Finding the solution of the WOPP is  
 361 far more complicated. See, for instance, Mooijaart, Commandeur (1990), Chu, Trendafilov (1998)  
 362 and Viklands (2006). An iterative procedure is often needed to compute the solution. For better  
 363 computational efficiency, we instead solve the problem with the original orthonormal constraint:

$$\begin{aligned} \text{minimize} \quad & \frac{1}{2} \|\mathbf{Y}\mathbf{W}^{\frac{1}{2}} - \mathbf{X}\mathbf{U}\mathbf{V}^{\top}\|_F^2 + \lambda \sum_{j=1}^p \|\mathbf{U}_{j\cdot}\|_2, \\ \text{s.t.} \quad & \mathbf{V}^{\top}\mathbf{V} = \mathbf{I}. \end{aligned} \tag{9}$$

364 That is, we amplify the magnitude of some responses so that the objective value is more sensitive  
 365 to the loss incurred on these responses. When making prediction, we will need to scale them back  
 366 to the original units.

### 367 3.4.3 Adjustment Covariates

368 In some applications such as genome-wide association studies (GWAS), there may be confounding  
 369 variables  $\mathbf{Z} \in \mathbb{R}^{n \times m}$  that we want to adjust for in the model. For example, population stratification,  
 370 defined as the existence of a systematic ancestry difference in the sample data, is one of the common  
 371 factors in GWAS that can lead to spurious discoveries. This can be controlled for by including some  
 372 leading principal components of the SNP matrix as variables in the regression (Price et al., 2006).  
 373 In the presence of such variables, we solve the following problem instead. With a slight abuse of  
 374 notation, in this section, we use  $\mathbf{W}$  to denote the coefficient matrix for the covariates instead of a  
 375 weight matrix:

$$\begin{aligned} \text{minimize} \quad & \frac{1}{2} \|\mathbf{Y} - \mathbf{Z}\mathbf{W} - \mathbf{X}\mathbf{U}\mathbf{V}^{\top}\|_F^2 + \lambda \sum_{j=1}^p \|\mathbf{U}^j\|_2, \\ \text{s.t.} \quad & \mathbf{V}^{\top}\mathbf{V} = \mathbf{I}. \end{aligned} \tag{10}$$

376 The main components don't change except two adjustments. When determining the starting  $\lambda$   
 377 value, we use Lemma 4.

**Lemma 4.** *In problem (10), if  $r > 0$ , the maximum  $\lambda$  that results in a nontrivial solution  $\hat{B}(\lambda)$  is*

$$\lambda_{\max} = \max_{1 \leq j \leq p} \|\mathbf{x}_j^{\top} \hat{\mathbf{R}}\|_2,$$

378 where  $\hat{\mathbf{R}} = \mathbf{Y} - \mathbf{Z}\hat{\mathbf{W}}$  and  $\hat{\mathbf{W}}$  is the multiple outcome regression coefficient matrix.

The proof is almost the same as before. The other nuance we should be careful about is when fitting the model, we should leave those covariates unpenalized because they serve for the adjustment purpose and should not be experiencing the selection stage. In particular, in the U-step (group lasso) given  $\mathbf{V}$ , direct computation would reduce to solving the problem

$$\underset{\mathbf{U}, \mathbf{W}}{\text{minimize}} \quad \frac{1}{2} \|\mathbf{YV} - \mathbf{Z}\mathbf{W}\mathbf{V} - \mathbf{XU}\|_F^2 + \lambda \sum_{j=1}^p \|\mathbf{U}^j\|_2,$$

which is not as convenient as standard group lasso problem. Instead, we find that  $\mathbf{W}$  can always be solved explicitly in terms of other variables. In fact, the minimizer  $\hat{\mathbf{W}} = (\mathbf{Z}^\top \mathbf{Z})^{-1} \mathbf{Z}^\top (\mathbf{Y} - \mathbf{XU}\mathbf{V}^\top)$ . Plug in and we find that the problem to be solved can be written as

$$\underset{\mathbf{U}}{\text{minimize}} \quad \frac{1}{2} \|(\mathbf{I} - \mathbf{H}_Z)\mathbf{YV} - (\mathbf{I} - \mathbf{H}_Z)\mathbf{XU}\|_F^2 + \lambda \sum_{j=1}^p \|\mathbf{U}^j\|_2,$$

379 where  $\mathbf{H}_Z = \mathbf{Z}(\mathbf{Z}^\top \mathbf{Z})^{-1} \mathbf{Z}^\top$  is the projection matrix on the column space of  $\mathbf{Z}$ . This becomes a  
 380 standard group lasso problem and can be solved by using, for example, the `glmnet` package with  
 381 the `mgaussian` family.

#### 382 3.4.4 Missing Values

In practice, there can be missing values in either the predictor matrix or the outcome matrix. If we only discard samples that have any missing value, we could lose a lot of information. For the predictor matrix, we could do imputation as simple as mean imputation or something sophisticated by leveraging the correlation structure. For missingness in the outcome, there is a natural way to integrate an imputation step seamlessly with the current procedure, analogous to the `softImpute` idea in Mazumder et al. (2010). We first define a projection operator for a subset of two dimensional indices  $\Omega \subseteq \{1, \dots, n\} \times \{1, \dots, p\}$ . Let  $\mathcal{P}_\Omega : \mathbb{R}^{n \times p} \rightarrow \mathbb{R}^{n \times p}$  be such that

$$\mathcal{P}_\Omega(\mathbf{Y})_{i,j} = \begin{cases} \mathbf{Y}_{i,j}, & (i,j) \in \Omega, \\ 0, & (i,j) \notin \Omega. \end{cases}$$

383 Let  $\Omega$  be the set of indices where the response values are observed; in other words,  $\Omega^c$  is the set of  
 384 missing locations. Instead of (3), now we solve the following problem.

$$\begin{aligned} \underset{\mathbf{U}, \mathbf{V}, \mathbf{Y}'}{\text{minimize}} \quad & \frac{1}{2} \|\mathcal{P}_\Omega(\mathbf{Y}) - \mathcal{P}_\Omega(\mathbf{XU}\mathbf{V}^\top)\|_F^2 + \lambda \sum_{j=1}^p \|\mathbf{U}^j\|_2, \\ \text{s.t.} \quad & \mathbf{V}^\top \mathbf{V} = \mathbf{I}. \end{aligned} \tag{11}$$

385 We can easily see that an equivalent formulation of the problem is

$$\begin{aligned} \underset{\mathbf{U}, \mathbf{V}, \mathbf{Y}'}{\text{minimize}} \quad & \frac{1}{2} \|\mathbf{Y}' - \mathbf{XU}\mathbf{V}^\top\|_F^2 + \lambda \sum_{j=1}^p \|\mathbf{U}^j\|_2, \\ \text{s.t.} \quad & \mathbf{V}^\top \mathbf{V} = \mathbf{I}, \mathcal{P}_\Omega(\mathbf{Y}') = \mathcal{P}_\Omega(\mathbf{Y}). \end{aligned}$$

386 This inspires a natural projection step to deal with the additional constraint. It can be well  
387 integrated with the current alternating minimization scheme. In fact, after each alternation between  
388 the U-step and the V-step, we can impute the missing values from the current predictions  $\mathbf{XUV}^\top$ ,  
389 and then continue into the next U-V alternation with the completed matrix.

### 390 3.4.5 Lazy Reduced Rank Regression

391 There is an alternative way to find a low-rank coefficient profile for the multivariate regression.  
392 Instead of pursuing to solve the non-convex problem (3) directly, we can follow a two-stage procedure:

1. Solve a full-rank multi-gaussian sparse regression, i.e.,

$$\text{minimize}_{\mathbf{B}} \quad \frac{1}{2} \|\mathbf{Y} - \mathbf{XB}\|_F^2 + \lambda \sum_{j=1}^p \|\mathbf{B}_{j\cdot}\|_2.$$

- 393 2. Conduct SVD of the resulting coefficient matrix  $\hat{\mathbf{B}}$  and use its rank  $r$  approximation as our  
394 final estimator.

395 The advantage of this approach is that it is stable. The first stage is a convex problem and can be  
396 handled efficiently by, for example, `glmnet`. A variety of adaptive screening rules are also applicable  
397 in this situation to assist dimension reduction. The second stage is fairly standard and efficient  
398 as long as there are not too many active variables. However, the disadvantage is clear too. The  
399 low-rank approximation is conducted in an unsupervised manner, so could lead to some degrade in  
400 the prediction performance.

401 That said, as before, we should still evaluate the out-of-sample performance as the penalty  
402 parameter  $\lambda$  varies and pick the best on the solution path as our final estimated model. In many  
403 cases, we compute the full-rank model under the exact mode anyways, so the set of lazy models  
404 can be thought of as an efficient byproduct for our choice.

## 405 3.5 Full Algorithm

406 We incorporate the options above and present the full algorithm in Algorithm 2.

---

**Algorithm 2** Large-scale and Ultrahigh-dimensional Sparse Reduced Rank Regression

---

- 1: Standardize or weight the responses. Define a sequence of  $\lambda$  values  $\lambda_1 > \dots > \lambda_L$ . Initialize  $\mathbf{U}(\lambda_0) = \mathbf{0}$ ,  $\mathbf{V}(\lambda_0) = \mathbf{0}$  and  $\mathbf{Y}_{\Omega^c}$ .
- 2: **for**  $\ell = 1$  **to**  $L$  **do**
- 3: Initialize  $t = 0$ ,  $\mathbf{U}(\lambda_\ell) = \mathbf{U}(\lambda_{\ell-1})$ ,  $\mathbf{V}(\lambda_\ell) = \mathbf{V}(\lambda_{\ell-1})$ ,  $\mathbf{W}(\lambda_\ell) = \mathbf{W}(\lambda_{\ell-1})$ , and  $\mathcal{A}(\lambda_\ell)$  be the active set at  $\lambda_{\ell-1}$ .
- 4: **while**  $t = 0$  **or** KKT Check at  $t - 1$  failed **do**
- 5: **[Variable Screening]** Find  $M$  variables  $S_M \subseteq \Omega \setminus \mathcal{A}(\lambda_\ell)$  with largest values in  $\|\mathbf{x}_j^\top (\mathbf{Y} - \mathbf{Z}\mathbf{W}(\lambda_\ell) - \mathbf{X}_{\mathcal{A}(\lambda_\ell)}\mathbf{U}_{\mathcal{A}(\lambda_\ell)}(\lambda_\ell)\mathbf{V}(\lambda_\ell)^\top)\|$ , and let

$$\mathcal{A}(\lambda_\ell) = \mathcal{A}(\lambda_\ell) \cup S_M.$$

- 6: **[Alternating Minimization]** Let  $k = 0$  and  $\mathbf{U}^{(0)} = \mathbf{U}_{\mathcal{A}(\lambda_\ell)}(\lambda_\ell)$ ,  $\mathbf{V}^{(0)} = \mathbf{V}(\lambda_\ell)$ ,  $\mathbf{W}^{(0)} = \mathbf{W}(\lambda_\ell)$  and  $\mathbf{Y}^{(0)} = \mathbf{Y}$ .
- 7: **while**  $k = 0$  **or**  $\|\mathbf{U}^{(k)}\mathbf{V}^{(k)\top} - \mathbf{U}^{(k-1)}\mathbf{V}^{(k-1)\top}\| > \epsilon$  **do**
- 8: **V-step:** Fix  $\mathbf{U}^{(k)}$ , solve  $\mathbf{V}$ : the orthogonal Procrustes problem

$$\underset{\mathbf{V}: \mathbf{V}^\top \mathbf{V} = \mathbf{I}}{\text{minimize}} \|\mathbf{Y}^{(k)} - \mathbf{Z}\mathbf{W}^{(k)} - \mathbf{X}_{\mathcal{A}(\lambda_\ell)}\mathbf{U}^{(k)}\mathbf{V}^\top\|_F^2.$$

Let  $(\mathbf{Y}^{(k)} - \mathbf{Z}\mathbf{W}^{(k)})^\top \mathbf{X}_{\mathcal{A}(\lambda_\ell)}\mathbf{U}^{(k)} = \mathbf{M}\mathbf{D}\mathbf{N}^\top$  (skinny SVD) and solve  $\mathbf{V}^{(k+1)} = \mathbf{M}\mathbf{N}^\top$ .

- 9: **U-step:** Fix  $\mathbf{V}^{(k+1)}$ , solve  $\mathbf{U}$  and  $\mathbf{W}$ : the group lasso problem

$$\mathbf{U}^{(k+1)} = \underset{\mathbf{U}}{\text{argmin}} \frac{1}{2} \|(\mathbf{I} - \mathbf{H}_Z)\mathbf{Y}^{(k)}\mathbf{V}^{(k+1)} - (\mathbf{I} - \mathbf{H}_Z)\mathbf{X}_{\mathcal{A}(\lambda_\ell)}\mathbf{U}\|_F^2 + \lambda_\ell \sum_{j=1}^p \|\mathbf{U}_j\|_2, \quad (12)$$

and  $\mathbf{W}^{(k+1)} = (\mathbf{Z}^\top \mathbf{Z})^{-1} \mathbf{Z}^\top (\mathbf{Y}^{(k)} - \mathbf{X}_{\mathcal{A}(\lambda_\ell)}\mathbf{U}^{(k+1)}\mathbf{V}^{(k+1)})$ .

- 10: **Y-step:** Impute the missing values

$$\mathbf{Y}_\Omega^{(k+1)} = \mathbf{Y}_\Omega^{(k)}, \quad \mathbf{Y}_{\Omega^c}^{(k+1)} = (\mathbf{Z}\mathbf{W}^{(k+1)} + \mathbf{X}_{\mathcal{A}(\lambda_\ell)}\mathbf{U}^{(k+1)}(\mathbf{V}^{(k+1)})^\top)_{\Omega^c}$$

- 11:  $k = k + 1$
- 12: **end while**
- 13: Let  $\mathbf{U}_{\mathcal{A}(\lambda_\ell)}(\lambda_\ell) = \mathbf{U}^{(k)}$ ,  $\mathbf{U}_{\mathcal{A}(\lambda_\ell)}(\lambda_\ell) = \mathbf{0}$ ,  $\mathbf{V}(\lambda_\ell) = \mathbf{V}^{(k)}$ ,  $\mathbf{W}(\lambda_\ell) = \mathbf{W}^{(k)}$  and  $\mathbf{Y} = \mathbf{Y}^{(k)}$ .
- 14: **[KKT Check]** Check the criterion for all  $j \in \Omega \setminus \mathcal{A}(\lambda_\ell)$ ,

$$\|\mathbf{x}_j^\top (\mathbf{Y} - \mathbf{Z}\mathbf{W}(\lambda_\ell) - \mathbf{X}_{\mathcal{A}(\lambda_\ell)}\mathbf{U}_{\mathcal{A}(\lambda_\ell)}(\lambda_\ell)\mathbf{V}(\lambda_\ell)^\top)\| \leq \lambda_\ell.$$

- 15:  $t = t + 1$
  - 16: **end while**
  - 17: **end for**
-



## 407 4 Convergence Analysis

In this section, we present some convergence properties of the alternating minimization algorithm (Algorithm 1) on sparse reduced rank regression. Let

$$g(\mathbf{U}, \mathbf{V}) = \frac{1}{2} \|\mathbf{Y} - \mathbf{X}\mathbf{U}\mathbf{V}^\top\|_F^2 + \lambda \sum_{j=1}^p \|\mathbf{U}^j\|_2.$$

**Theorem 1.** *For any  $k \geq 1$ , the function values are monotonically decreasing:*

$$g(\mathbf{U}^k, \mathbf{V}^k) \geq g(\mathbf{U}^{k+1}, \mathbf{V}^k) \geq g(\mathbf{U}^{k+1}, \mathbf{V}^{k+1}).$$

Furthermore, we have the following finite convergence rate:

$$\min_{1 \leq k \leq K} g(\mathbf{U}^k, \mathbf{V}^k) - g(\mathbf{U}^{k+1}, \mathbf{V}^{k+1}) \leq \frac{1}{K} (g(\mathbf{U}^1, \mathbf{V}^1) - g^\infty),$$

408 where  $g^\infty = \lim_{k \rightarrow \infty} g(\mathbf{U}^k, \mathbf{V}^k)$ . It implies that the iteration will terminate in  $O(1/\epsilon)$  iterations.

409 The proof is straightforward and we won't detail here. It presents the fact that alternating  
410 minimization is a descent algorithm. In fact, this property holds for all alternating minimization  
411 or more general blockwise coordinate descent algorithms. However it does not say how good the  
412 limiting point is. In the next result, we show a local convergence result that under some regularity  
413 conditions, if the initialization is closer enough to a global minimum, it will converge to a global  
414 minimum at linear rate. It is based on similar results on proximal gradient descent by Dubois et al.  
415 (2019). To define a local neighborhood, it would be easier if we eliminate  $\mathbf{V}$  by always setting it to  
416 a minimizer given  $\mathbf{U}$ . That is, the objective function becomes  $F_\lambda(\mathbf{U}) = \frac{1}{2} \|\mathbf{X}\mathbf{U}\|_2^2 - \|\mathbf{Y}^\top \mathbf{X}\mathbf{U}\|_* +$   
417  $\lambda \sum_{j=1}^p \|\mathbf{U}_j\|_2$ . We define a sublevel set  $\mathcal{S}_c(\lambda) = \{\mathbf{U} \in \mathbb{R}^{p \times r} : F_\lambda(\mathbf{U}) \leq c\}$ .

**Theorem 2.** *Assume  $\mathbf{X}^\top \mathbf{X}$  is invertible and  $\sigma_{\max}^2 \geq \sigma_{\min}^2 > 0$  be its smallest and largest eigenvalues. Let  $s_j$  be the  $j$ th singular value of  $(\mathbf{X}^\top \mathbf{X})^{-\frac{1}{2}} \mathbf{X}^\top \mathbf{Y}$ . There exists  $\bar{\lambda} > 0$  such that for all  $0 \leq \lambda < \bar{\lambda}$  and  $0 \leq \mu < \sigma_{\min}^2 (1 - s_{r+1}^2 / s_r^2)$ , there is a sublevel set  $\mathcal{S}(\lambda, \mu)$  where the level depends on  $\lambda$  and  $\mu$  such that if  $\mathbf{U}^k \in \mathcal{S}(\lambda, \mu)$ , we have*

$$\Delta(\mathbf{U}^{k+1}, \mathbf{V}^{k+1}) \leq \left( 1 - \min \left( \frac{1}{2}, \frac{\mu}{\sigma_{\max}^2} \right) \right) \Delta(\mathbf{U}^k, \mathbf{V}^k),$$

418 where  $\Delta(\mathbf{U}, \mathbf{V}) = g(\mathbf{U}, \mathbf{V}) - g(\mathbf{U}^*, \mathbf{V}^*)$  and  $(\mathbf{U}^*, \mathbf{V}^*)$  is a global minimum.

419 From a high level, the proof is based on the fact that under the conditions, the function is strongly  
420 convex near the global minima. If we starting from this region, we achieve good convergence rate  
421 with alternating minimization algorithm. The full proof is given in Appendix A.3.

422 It is easy to see that the theorem above implicitly assumes the classical setting where  $n \geq p$   
423 since otherwise  $\mathbf{X}^\top \mathbf{X}$  would not be invertible. However, it is still applicable to our algorithm. The  
424 algorithm does not attempt to solve alternating minimization at the full scale, but only does it  
425 after variable screening. With screening, it is very likely that we will again be working under the  
426 classical setting. Moreover, with warm start, there is higher chance that the initialization lies in the  
427 local region as defined above. Therefore, this theorem can provide useful guidance on the practical  
428 computational performance of the algorithm.

## 429 5 Simulation Studies

430 We conduct some experiments to gain more insight into the method and compare with the single-  
431 response lasso method. Due to space limit, we demonstrate the results in one experiment setting  
432 and include results for other settings such as correlated features, deviation from the true low-rank  
433 structure etc., in Appendix C. We experiment with three different sizes and three different signal-  
434 to-noise ratio (SNR):  $(n, p, k) = (200, 100, 20), (200, 500, 20), (200, 500, 50)$ , where  $k$  is the number  
435 of variables with true nonzero coefficients, and the target SNR = 0.5, 1, or 3. The number of  
436 responses  $q = 20$  and the true rank  $r = 3$ . We generate the  $\mathbf{X} \in \mathbb{R}^{n \times p}$  with independent samples  
437 from some multivariate Gaussian  $\mathcal{N}(0, \Sigma_X)$  where  $\Sigma_X = \mathbf{I}_p$  in this section. More results under  
438 correlated designs are presented in the appendix. The response is generated from the true model  
439  $\mathbf{Y} = \mathbf{X}\mathbf{U}\mathbf{V}^\top + \mathbf{E}$ , where each entry in the support of  $\mathbf{U} \in \mathbb{R}^{p \times r}$  (sparsity  $k$ ) is independently drawn  
440 from a standard Gaussian distribution, and  $\mathbf{V} \in \mathbb{R}^{q \times r}$  takes the left singular matrix of a Gaussian  
441 ensemble. Hence  $\mathbf{B} = \mathbf{U}\mathbf{V}^\top$  is the true coefficient matrix. The noise matrix is generated from  
442  $\mathcal{N}(0, \sigma_e^2 \mathbf{I}_q)$ , where  $\sigma_e^2$  is chosen such that the signal-to-noise ratio

$$\text{SNR} = \frac{\text{Tr}(\mathbf{B}^\top \Sigma_X \mathbf{B})}{\sigma_e^2 \cdot \text{Tr}(\Sigma_E)} \quad (13)$$

is set to a given level. The performance is evaluated by the test  $R^2$ , defined as follows:

$$R^2 = 1 - \frac{\|\mathbf{Y} - \mathbf{X}\hat{\mathbf{B}}\|_F^2}{\|\mathbf{Y} - \hat{\mathbf{Y}}\|_F^2}.$$

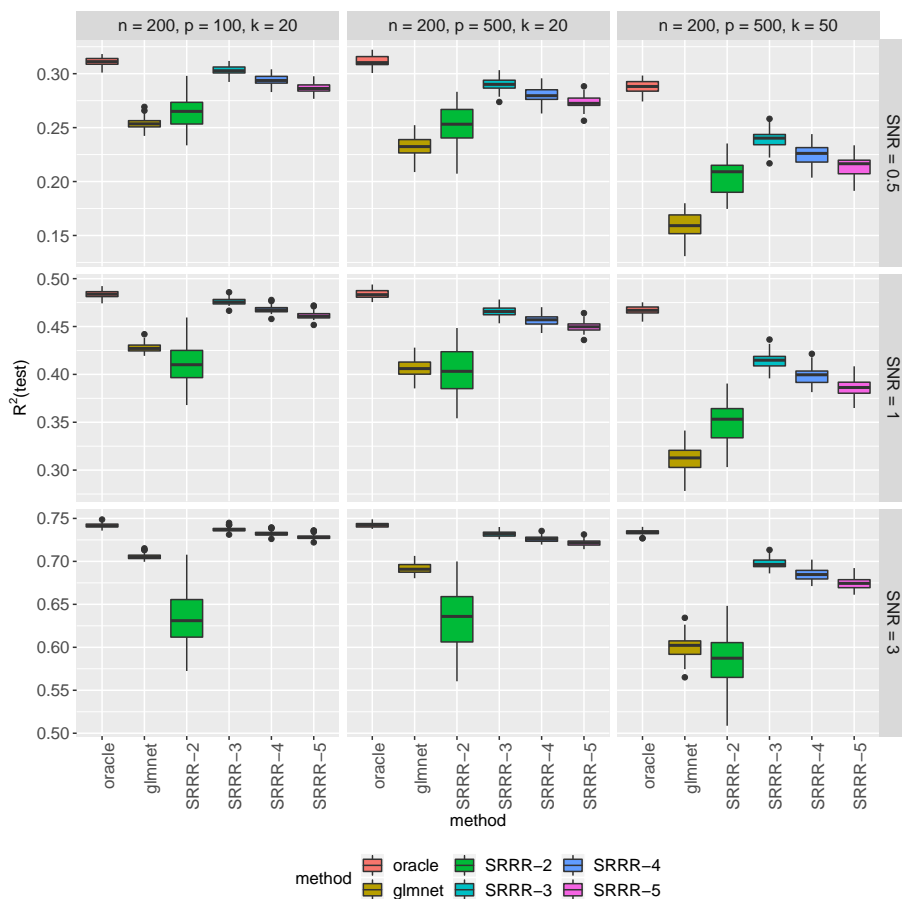

**Figure 3:**  $R^2$  each run is evaluated on a test set of size 5000. “oracle” is the result where we know the true active variables and solve on this subset of variables. “glmnet” fits the responses separately. “SRRR- $r$ ” indicates the SRRR results with assumed rank  $r$ .

443 The main insight we obtain from the experiments is that the method is more robust to over-  
 444 estimating than underestimating the rank. A significant degrade in performance can be identified  
 445 even if we are only off the rank by 1 from below. In contrast, the additional variance brought along  
 446 by overestimating the rank doesn’t seem to be a big concern. This, in essence, can be ascribed to  
 447 bias and variance decomposition. In our settings, the bias incurred in underestimating the rank  
 448 and thus 1/3 loss of parameters contributes a lot more to the MSE compared with the increased  
 449 variance due to 1/3 redundancy in the parameters.

## 450 6 Real Data Application: UK Biobank

451 The UK Biobank (Bycroft et al., 2018) is a large, prospective population-based cohort study with  
 452 individuals collected from multiple sites across the United Kingdom. It contains extensive genetic  
 453 and phenotypic detail such as genome-wide genotyping, questionnaires and physical measures for a

454 wide range of health-related outcomes for over 500,000 participants, who were aged 40-69 years when  
455 recruited in 2006-2010. In this study, we are interested in the relationship between an individual's  
456 genotype and his/her phenotypic outcomes. While genome-wide association studies (GWAS) focus  
457 on identifying SNPs that may be marginally associated with the outcome using univariate tests,  
458 we would like to leverage the additive effect of all SNPs to make good prediction. Recently there  
459 is a line of work (Qian et al., 2019; Sinnott-Armstrong et al., 2019; Lello et al., 2018) that builds a  
460 lasso solution on the large dataset and shows that the prediction is much improved over previous  
461 methods. Furthermore, a number of phenotypes present nontrivial correlation structures and we  
462 would like to further improve the prediction and stabilize the variable selection by building a joint  
463 model for multiple outcomes.

464 We focused on 337,199 White British unrelated individuals out of the full set of over 500,000 from  
465 the UK Biobank dataset (Bycroft et al., 2018) that satisfy the same set of population stratification  
466 criteria as in DeBoever et al. (2018). Each individual has up to 805,426 measured variants, and  
467 each variant is encoded by one of the four levels where 0 corresponds to homozygous major alleles, 1  
468 to heterozygous alleles, 2 to homozygous minor alleles and NA to a missing genotype. In addition,  
469 we have available covariates such as age, sex, and forty pre-computed principal components of the  
470 SNP matrix. Among them, we use age, sex and the top 10 PCs for the adjustment of population  
471 stratification (Price et al., 2006).

472 There are binary responses in the data such as many disease outcomes. Although in principle  
473 we can solve for a mixture of Gaussian and binomial likelihood using Newton's method, for ease of  
474 computation in this large-scale setting, it is a reasonable approximation to treat them as continuous  
475 responses and fit the standard SRRR model. However, after the model is fit, we will refit a logistic  
476 regression on the predicted score to obtain a probability estimation. Notice that the refit is still  
477 trained on the training set at each  $\lambda$  value.

478 The number of samples is large in the UK Biobank dataset, so we afford to set aside an inde-  
479 pendent validation set without resorting to costly cross-validation to find an optimal regularization  
480 parameter. We also leave out a subset of observations as test set to evaluate the final model.  
481 In particular, we randomly partition the original dataset so that 70% is used for training, 10%  
482 for validation and 20% for test. The solution path is fit on the training set, whereas the desired  
483 regularization is selected on the validation set, and the final model is evaluated on the test set.

In the experiment, we compare the performance of the multivariate-response SRRR model with  
the single-response lasso model. To fit the lasso model, we rely on fast implementation of the  
**snpnet** package (Qian et al., 2019), and we also refer to the lasso results as **snpnet** in the results  
section. For continuous responses, we evaluate the prediction by R-squared ( $R^2$ ). Given a linear  
coefficient vector  $\hat{\beta}$  (fitted on the training set) and a subset of data  $\{(x_i, y_i), 1 \leq i \leq n\}$ , it is defined  
as

$$R^2 = 1 - \frac{\sum_{i=1}^n (y_i - x_i^\top \hat{\beta})^2}{\sum_{i=1}^n (y_i - \bar{y})^2}.$$

484 We compute  $R^2$  respectively on the training, validation and test sets. For binary response, mis-  
485 classification error could be used but it would depend on the calibration. Instead the receiver  
486 operating characteristic (ROC) curve provides more information and demonstrates the tradeoff be-  
487 tween true positive and false positive rates under different thresholds. The area under the curve  
488 (AUC) computes the area under the ROC curve — a larger value indicates a generally better classi-  
489 fier. Therefore, we will evaluate AUCs on the training, validation and test sets for binary responses.  
490 When comparing different methods, we evaluate both absolute change and relative change over the

491 baseline method (in particular the already competitive lasso in our case), where the relative change  
492 for a given metric is defined as  $(\text{metric}_{\text{new}} - \text{metric}_{\text{lasso}}) / |\text{metric}_{\text{lasso}}|$ .

493 Computationally, in the UK Biobank experiments, the SNP data are stored in a compressed  
494 PLINK format with two-bit encodings. PLINK 2.0 (Chang et al., 2015) provides an extensive set  
495 of efficient operations including very fast, multithreaded matrix multiplication. In particular, this  
496 matrix multiplication module is heavily used in the steps of screening and KKT check in this work  
497 and other lasso-based results (Li et al., 2020; Qian et al., 2019) on the UK Biobank.

## 498 6.1 Asthma and 7 Blood Biomarkers

499 Here, we defined asthma based on a mixture of self-reported questionnaire data and hospital in-  
500 patient record data described in DeBoever et al. (2018); Tanigawa et al. (2019). Furthermore, we  
501 focused on 7 additional blood count measurements from Category 100081 in UK Biobank containing  
502 results of haematological assays that were performed on whole blood.

503 We apply the SRRR to the set of phenotypes and expect some performance improvement by  
504 leveraging the correlation structure. Choice of the phenotypes: monocyte count, neutrophil count,  
505 eosinophil count, basophil count, forced vital capacity (FVC), peak expiratory flow (PEF), and  
506 forced expiratory volume in 1 second (FEV1).

507 Overall, we see small rank representation can maintain predictive power for specific phenotypes  
508 (see Figure 4) and that overall the multiresponse model improves the prediction over the single-  
509 response lasso model (see Figure 5).

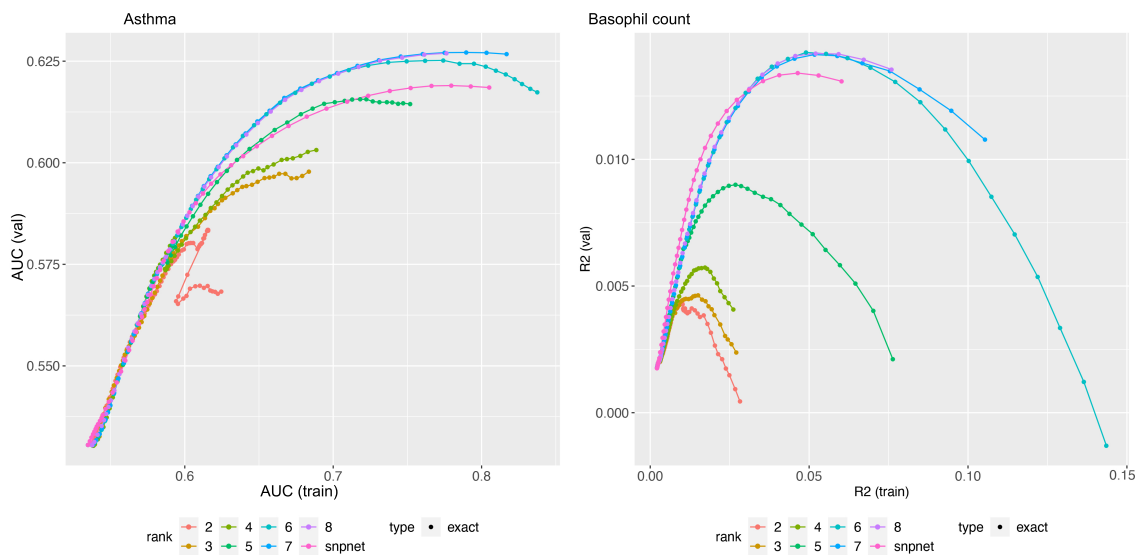

**Figure 4:** Asthma and Basophil count prediction performance plots. Different colors correspond to lower rank predictive performance across (x-axis) training data set and (y-axis) validation data set for (left) asthma and (right) basophil count.

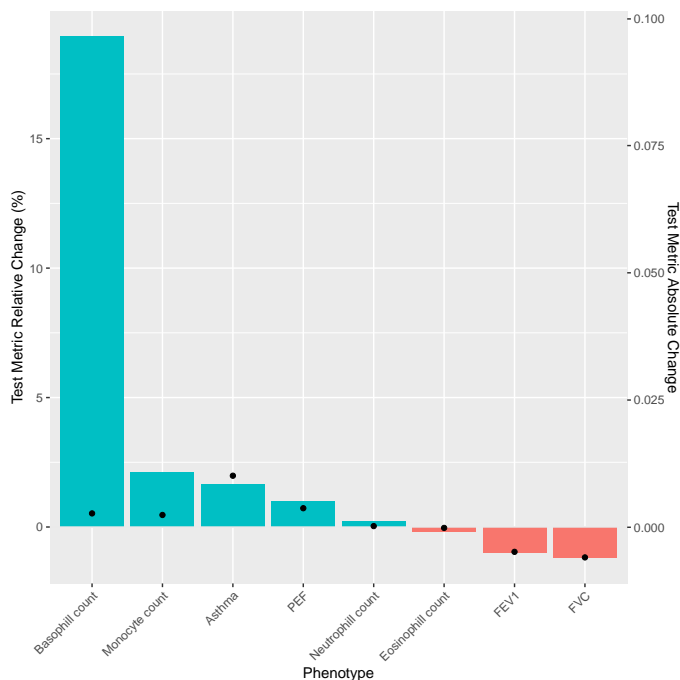

**Figure 5:** Change in prediction accuracy for multiresponse model compared to single response model. (top) (y-axis 1 bar)  $R^2$  relative change (%) for each phenotype (x-axis) and  $R^2$  absolute change (y-axis 2).

## 510 6.2 35 Biomarkers

511 In addition, we used 35 biomarkers from the UK Biobank biomarker panel in Sinnott-Armstrong  
512 et al. (2019), and apply SRRR to the dataset. Noticeably, for the liver biomarkers including alanine  
513 aminotransferase and albumin, and the urinary biomarkers including Microalbumin in urine and  
514 Sodium in urine, we see an improvement in prediction performance for the SRRR application beyond  
515 the single-response snpnet models (see Figures 6 and 7).

516 We can represent the lower rank representation as a biplot of the singular value decomposition  
517 of the coefficient matrix (Gower et al., 2011; Gabriel, 1971; Tanigawa et al., 2019). Specifically, we  
518 display phenotypes projected on phenotype principal components as a scatter plot. We also show  
519 variants projected on variant principal components as a separate scatter plot and added phenotype  
520 singular vectors as arrows on the plot using sub-axes. In scatter plot with biplot annotation, the  
521 inner product of a genetic variant and a phenotype represents the direction and the strength of the  
522 projection of the genetic association of the variant-phenotype pair on the displayed latent compo-  
523 nents. For example, when a variant and a phenotype share the same direction on the annotated  
524 scatter plot, that means the projection of the genetic associations of the variant-phenotype pair on  
525 the displayed latent components is positive. When a variant-phenotype pair is projected on the  
526 same line, but on the opposite direction, the projection of the genetic associations on the shown  
527 latent components is negative. When the variant and phenotype vectors are orthogonal or one of  
528 the vectors are of zero length, the projection of the genetic associations of the variant-phenotype  
529 pair on the displayed latent components is zero. We focused on the top five key SRRR components

530 for AST to ALT ratio (see Figure 8).

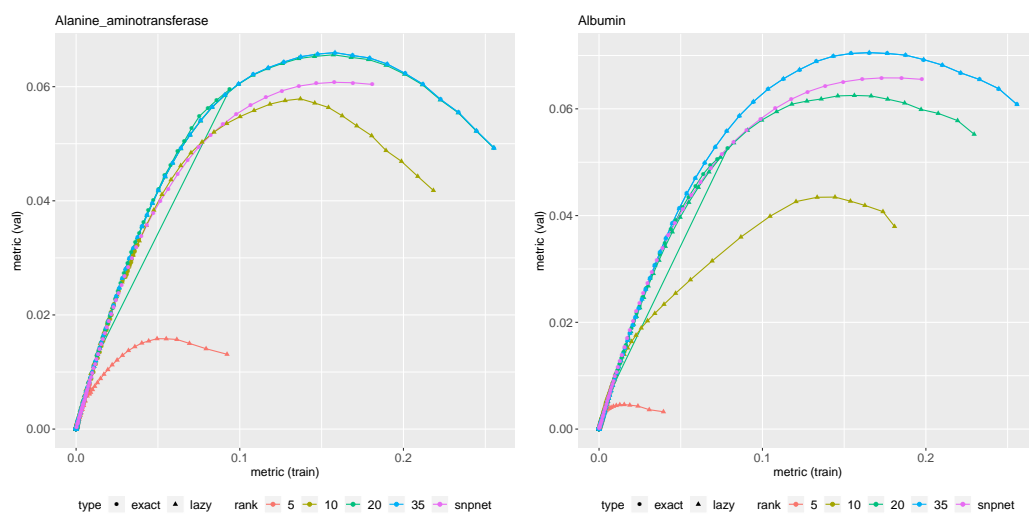

**Figure 6:** Alanine aminotransferase and albumin prediction performance plots. Different colors correspond to lower rank predictive performance across (x-axis) training data set and (y-axis) validation data set for (left) alanine aminotransferase and (right) albumin. For lower rank representation we applied lazy rank evaluation.

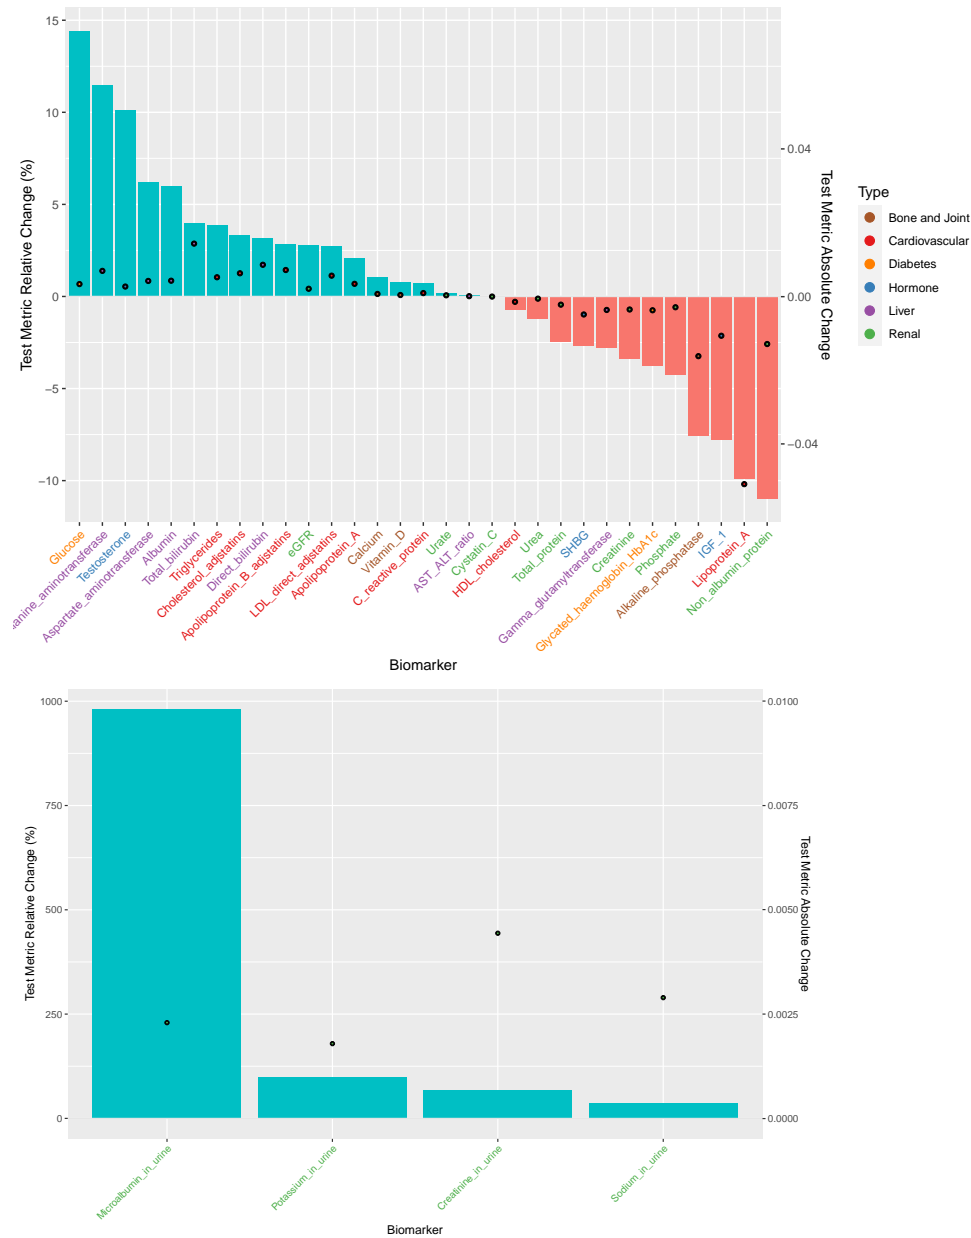

**Figure 7:** Change in prediction accuracy for multiresponse model compared to single response model. (top) (y-axis 1 bar)  $R^2$  relative change (%) for each biomarker (x-axis) across different biomarker category (color) and  $R^2$  absolute change (y-axis 2). (bottom) Change in predictive accuracy for multiresponse model compared to single response model for urinary biomarkers.



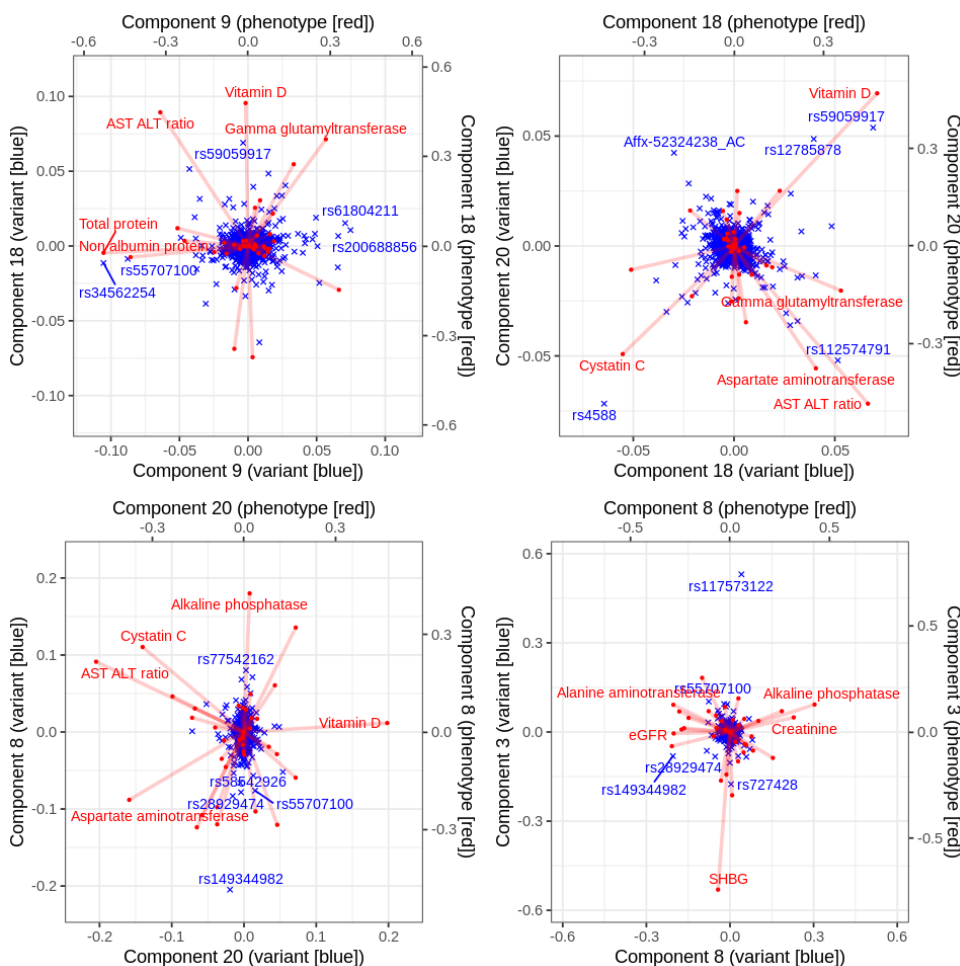

**Figure 8:** The latent structures of the the top five key SRRR components for AST to ALT ratio. Using trait squared cosine score described in Tanigawa et al. (2019), the top five key SRRR components for AST to ALT ratio (components 9, 18, 20, 8, and 3) are identified from a full-rank SVD of coefficient matrix  $C$  from SRRR ( $C = UDV^T$ ) and shown as a series of biplots. In each panel, principal components of genetic variants (rows of  $UD$ ) are shown in blue as scatter plot using the main axis and singular vectors of traits (rows of  $V$ ) are shown in red dots with lines using the secondary axis, for the identified key components. The five traits and variants with the largest distance from the center of origin are annotated with their name.

## 531 7 Related Work

532 There are many other methods that were proposed for multivariate regression in high-dimensional  
 533 settings. Chen, Huang (2012) compares the SRRR with rank-free methods including  $L_2$ SVS Similä,  
 534 Tikka (2007),  $L_\infty$ SVS (Turlach et al., 2005) that replaces the  $l_2$ -norm with  $l_\infty$ -norm of each row,  
 535 and RemMap (Peng et al., 2010) that imposes an additional elementwise sparsity of the coefficient

536 matrix. It also compares with the SPLS Chun, Keleş (2010) and points out that the latter does not  
537 target directly on prediction of the responses so the performance turns out not as good. Another  
538 important category of methods Canonical Correlation Analysis (CCA) (Hotelling, 1936) that tries to  
539 constructed uncorrelated components in both the feature space and the response space to maximize  
540 their correlation coefficients also falls short in the aspect, even though some connection can be  
541 established with the reduced rank regression as seen in Appendix B.

542 More recently, there is a line of new advances in sparse and low-rank regression problems. For  
543 example, Ma, Sun (2014) proposed a subspace assisted regression with row sparsity and studied  
544 its near-optimal estimation properties. Ma et al. (2020) furthered this work to a two-way sparsity  
545 setting, where nonzero entries are present only on a few rows and columns. Li et al. (2019) proposed  
546 an integrative multi-view reduced-rank regression that encourages group-wise low-rank coefficient  
547 matrices with a composite nuclear norm. Dubois et al. (2019) developed a fast first-order proximal  
548 gradient algorithm on the SRRR objective reparameterized by a single matrix and proves linear  
549 local convergence. Luo et al. (2018) proposed a mixed-outcome reduced-rank regression method  
550 that deals with different types of responses and also missing data, though it does not aim for  
551 high-dimensional settings with variable selection.

552 In genetics, some approaches proposed to decompose genetic associations from summary level  
553 data using LD-pruning along with p-value thresholding for variable selection in an approach referred  
554 to as DeGAs (Tanigawa et al., 2019) and MetaPhat (Lin et al., 2019). DeGAs was extended for  
555 genetic risk prediction and to "paint" an individual's risk to a disease based on genetic component  
556 loadings in an approach referred to as DeGAs-risk (Aguirre et al., 2019).

## 557 8 Summary and Discussion

558 In this paper, we propose a method that takes into account both sparsity in high-dimensional regres-  
559 sion problems and low-rank structure when multiple correlated outcomes are present. A screening-  
560 based alternating minimization algorithm is designed to deal with large-scale and ultrahigh-dimensional  
561 applications, such as the UK Biobank population cohort. We demonstrate the effectiveness of the  
562 method on both synthetic and real datasets focusing on asthma and 7 related blood count biomark-  
563 ers, in addition to the 35 biomarker panel made available by UK Biobank (Sinnott-Armstrong et al.,  
564 2019). We anticipate that the approach presented here will generalize to thousands of phenotypes  
565 that are currently being measure in UK Biobank, e.g. metabolomics and imaging data that are  
566 currently being generated in over 100,000 individuals.

567 Methodologically, in the UK Biobank experiments, we use continuous approximation to binary  
568 outcomes. This is a reasonable assumption but ideally one would like to solve the exact problem  
569 based on their respective likelihood. In principle, there is no theoretical challenge in the algorithmic  
570 design. We can use Newton's method and enclose the procedure with an outer loop that conducts  
571 quadratic approximation of the objective function. However, the quadratic problem involving both  
572 penalty and low-rank constraint can be very messy. We might need some heuristics to find a more  
573 convenient approximation. We see this as future work along with extending the SRRR algorithm  
574 to other families including time-to-event multiple responses that can be used for survival analysis.  
575 Furthermore, for an individual we can project a variant and phenotype loading across the reduced  
576 rank to their risk to arrive at a similar analysis of outlier individuals with unusual painting of  
577 genetic risk and to quantify the overall contribution of a component which may aid in disease risk  
578 interpretation. Overall, we see the method and algorithms presented here as an important toolkit  
579 to the prediction problem in human genetics.

## 580 Acknowledgement

581 This research has been conducted using the UK Biobank Resource under Application Number  
582 24983, “Generating effective therapeutic hypotheses from genomic and hospital linkage data” (<http://www.ukbiobank.ac.uk/wp-content/uploads/2017/06/24983-Dr-Manuel-Rivas.pdf>). Based  
583 on the information provided in Protocol 44532 the Stanford IRB has determined that the re-  
584 search does not involve human subjects as defined in 45 CFR 46.102(f) or 21 CFR 50.3(g). All  
585 participants of UK Biobank provided written informed consent (more information is available  
586 at <https://www.ukbiobank.ac.uk/2018/02/gdpr/>). We thank all the participants in the UK  
587 Biobank. M.A.R. is supported by Stanford University and a National Institutes of Health (NIH)  
588 Center for Multi- and Trans-ethnic Mapping of Mendelian and Complex Diseases grant (5U01  
589 HG009080). Y.T. is supported by a Funai Overseas Scholarship from the Funai Foundation for  
590 Information Technology and the Stanford University School of Medicine. Research reported in this  
591 publication was supported by the National Human Genome Research Institute of the NIH under  
592 Award Number R01HG010140 (M.A.R.). The content is solely the responsibility of the authors  
593 and does not necessarily represent the official views of the NIH. R.T. was partially supported by  
594 NIH grant 5R01 EB001988-16 and NSF grant 19 DMS1208164. T.H. was partially supported by  
595 grant DMS-1407548 from the National Science Foundation, and grant 5R01 EB 001988-21 from the  
596 National Institutes of Health.  
597

## 598 References

- 599 *Abadi Martín, Barham Paul, Chen Jianmin, Chen Zhifeng, Davis Andy, Dean Jeffrey, Devin*  
600 *Mathieu, Ghemawat Sanjay, Irving Geoffrey, Isard Michael, Kudlur Manjunath, Levenberg Josh,*  
601 *Monga Rajat, Moore Sherry, Murray Derek G., Steiner Benoit, Tucker Paul, Vasudevan Vijay,*  
602 *Warden Pete, Wicke Martin, Yu Yuan, Zheng Xiaoqiang.* **TensorFlow: A System for Large-scale**  
603 **Machine Learning** // Proceedings of the 12th USENIX Conference on Operating Systems Design  
604 and Implementation. Berkeley, CA, USA: USENIX Association, 2016. 265–283. (OSDI’16).
- 605 *Aguirre Matthew, Tanigawa Yosuke, Venkataraman Guhan, Tibshirani Rob, Hastie Trevor, Rivas*  
606 *Manuel A.* Polygenic risk modeling with latent trait-related genetic components // BioRxiv.  
607 2019. 808675.
- 608 *Anderson T. W.* Estimating Linear Restrictions on Regression Coefficients for Multivariate Normal  
609 Distributions // *Ann. Math. Statist.* 09 1951. 22, 3. 327–351.
- 610 *Bach Francis R.* Consistency of the group lasso and multiple kernel learning // *Journal of Machine*  
611 *Learning Research.* 2008. 9, Jun. 1179–1225.
- 612 *Bickel Peter J., Ritov Ya’acov, Tsybakov Alexandre B.* Simultaneous analysis of Lasso and Dantzig  
613 selector // *Ann. Statist.* 08 2009. 37, 4. 1705–1732.
- 614 *Bottou Léon.* Large-scale machine learning with stochastic gradient descent // Proceedings of  
615 COMPSTAT’2010. 2010. 177–186.
- 616 *Bovet Daniel P, Cesati Marco.* Understanding the Linux Kernel: from I/O ports to process man-  
617 agement. 2005.

- 618 *Boyd Stephen, Boyd Stephen P, Vandenberghe Lieven.* Convex optimization. 2004.
- 619 *Bühlmann Peter, Van De Geer Sara.* Statistics for high-dimensional data: methods, theory and  
620 applications. 2011.
- 621 *Bycroft Clare, Freeman Colin, Petkova Desislava, Band Gavin, Elliott Lloyd T., Sharp Kevin, Mo-*  
622 *tyer Allan, Vukcevic Damjan, Delaneau Olivier, O'Connell Jared, Cortes Adrian, Welsh Saman-*  
623 *tha, Young Alan, Effingham Mark, McVean Gil, Leslie Stephen, Allen Naomi, Donnelly Peter,*  
624 *Marchini Jonathan.* The UK Biobank Resource with Deep Phenotyping and Genomic Data //  
625 Nature. 2018. 562, 7726. 203–209.
- 626 *Chang Christopher C, Chow Carson C, Tellier Laurent CAM, Vattikuti Shashaank, Purcell*  
627 *Shaun M, Lee James J.* Second-generation PLINK: rising to the challenge of larger and richer  
628 datasets // GigaScience. 02 2015. 4, 1.
- 629 *Chen Lisha, Huang Jianhua Z.* Sparse reduced-rank regression for simultaneous dimension reduction  
630 and variable selection // Journal of the American Statistical Association. 2012. 107, 500. 1533–  
631 1545.
- 632 *Chu Moody T, Trendafilov Nickolay T.* On a differential equation approach to the weighted orthog-  
633 onal Procrustes problem // Statistics and Computing. 1998. 8, 2. 125–133.
- 634 *Chun Hyonho, Keleş Sündüz.* Sparse partial least squares regression for simultaneous dimension  
635 reduction and variable selection // Journal of the Royal Statistical Society: Series B (Statistical  
636 Methodology). 2010. 72, 1. 3–25.
- 637 *DeBoever Christopher, Tanigawa Yosuke, Lindholm Malene E., McInnes Greg, Lavertu Adam,*  
638 *Ingelsson Erik, Chang Chris, Ashley Euan A., Bustamante Carlos D., Daly Mark J., Rivas*  
639 *Manuel A.* Medical Relevance of Protein-Truncating Variants across 337,205 Individuals in the  
640 UK Biobank Study // Nature Communications. 2018. 9, 1. 1612.
- 641 *Dean Jeffrey, Ghemawat Sanjay.* MapReduce: Simplified Data Processing on Large Clusters //  
642 Commun. ACM. I 2008. 51, 1. 107–113.
- 643 *Dubois Benjamin, Delmas Jean-François, Obozinski Guillaume.* Fast Algorithms for Sparse  
644 Reduced-Rank Regression // Proceedings of Machine Learning Research. 89. 16–18 Apr 2019.  
645 2415–2424. (Proceedings of Machine Learning Research).
- 646 *Duchi John C, Agarwal Alekh, Wainwright Martin J.* Dual averaging for distributed optimization:  
647 Convergence analysis and network scaling // IEEE Transactions on Automatic control. 2011. 57,  
648 3. 592–606.
- 649 *Efron Bradley, Hastie Trevor.* Computer Age Statistical Inference: Algorithms, Evidence, and Data  
650 Science. 5. 2016.
- 651 *Friedman Jerome, Hastie Trevor, Tibshirani Rob.* Regularization Paths for Generalized Linear  
652 Models via Coordinate Descent. 2010. 1–22.
- 653 *Gabriel Karl Ruben.* The biplot graphic display of matrices with application to principal component  
654 analysis // Biometrika. 1971. 58, 3. 453–467.

- 655 *Gower John C, Lubbe Sugnet Gardner, Le Roux Niel J.* Understanding biplots. 2011.
- 656 *Greenshtein Eitan, Ritov Ya'Acov.* Persistence in high-dimensional linear predictor selection and  
657 the virtue of overparametrization // *Bernoulli*. 12 2004. 10, 6. 971–988.
- 658 *Hastie Trevor, Tibshirani Robert, Friedman Jerome.* The Elements of Statistical Learning: Data  
659 Mining, Inference, and Prediction, 2nd Edition. 2009. (Springer series in statistics).
- 660 *Hotelling Harold.* Relations Between Two Sets of Variates // *Biometrika*. 1936. 28, 3/4. 321–377.
- 661 *Lello Louis, Avery Steven G, Tellier Laurent, Vazquez Ana I, Campos Gustavo de los, Hsu  
662 Stephen DH.* Accurate genomic prediction of human height // *Genetics*. 2018. 210, 2. 477–  
663 497.
- 664 *Li Gen, Liu Xiaokang, Chen Kun.* Integrative multi-view regression: Bridging group-sparse and  
665 low-rank models // *Biometrics*. 2019. 75, 2. 593–602.
- 666 *Li Ruilin, Chang Christopher, Justesen Johanne Marie, Tanigawa Yosuke, Qian Junyang, Hastie  
667 Trevor, Rivas Manuel A, Tibshirani Robert j.* Fast Lasso method for Large-scale and Ultrahigh-  
668 dimensional Cox Model with applications to UK Biobank // *BioRxiv*. 2020.
- 669 *Lin Jake, Tabassum Rubina, Ripatti Samuli, Pirinen Matti.* MetaPhat: Detecting and decomposing  
670 multivariate associations from univariate genome-wide association statistics // *bioRxiv*. 2019.  
671 661421.
- 672 *Luo Chongliang, Liang Jian, Li Gen, Wang Fei, Zhang Changshui, Dey Dipak K, Chen Kun.*  
673 Leveraging mixed and incomplete outcomes via reduced-rank modeling // *Journal of Multivariate  
674 Analysis*. 2018. 167. 378–394.
- 675 *Ma Zhuang, Ma Zongming, Sun Tingni.* Adaptive Estimation in Two-way Sparse Reduced-rank  
676 Regression // *Statistica Sinica*. 01 2020.
- 677 *Ma Zongming, Sun Tingni.* Adaptive sparse reduced-rank regression // *arXiv preprint  
678 arXiv:1403.1922*. 2014.
- 679 *Mazumder Rahul, Hastie Trevor, Tibshirani Robert.* Spectral regularization algorithms for learning  
680 large incomplete matrices // *Journal of Machine Learning Research*. 2010. 11, Aug. 2287–2322.
- 681 *Meinshausen Nicolai, Bühlmann Peter.* High-dimensional graphs and variable selection with the  
682 Lasso // *Ann. Statist.* 06 2006. 34, 3. 1436–1462.
- 683 *Mooijaart Ab, Commandeur Jacques JF.* A general solution of the weighted orthonormal Procrustes  
684 problem // *Psychometrika*. 1990. 55, 4. 657–663.
- 685 *Obozinski Guillaume, Wainwright Martin J, Jordan Michael I, others .* Support union recovery in  
686 high-dimensional multivariate regression // *The Annals of Statistics*. 2011. 39, 1. 1–47.
- 687 *Peng Jie, Zhu Ji, Bergamaschi Anna, Han Wonshik, Noh Dong-Young, Pollack Jonathan R, Wang  
688 Pei.* Regularized multivariate regression for identifying master predictors with application to  
689 integrative genomics study of breast cancer // *The Annals of Applied Statistics*. 2010. 4, 1. 53.

- 690 *Price Alkes L., Patterson Nick J., Plenge Robert M., Weinblatt Michael E., Shadick Nancy A., Reich*  
691 *David.* Principal Components Analysis Corrects for Stratification in Genome-Wide Association  
692 *Studies // Nature Genetics.* 2006. 38. 904.
- 693 *Qian Junyang, Du Wenfei, Tanigawa Yosuke, Aguirre Matthew, Tibshirani Robert, Rivas Manuel A,*  
694 *Hastie Trevor.* A Fast and Flexible Algorithm for Solving the Lasso in Large-scale and Ultrahigh-  
695 *dimensional Problems // BioRxiv.* 2019. 630079.
- 696 *Similä Timo, Tikka Jarkko.* Input selection and shrinkage in multiresponse linear regression //  
697 *Computational Statistics & Data Analysis.* 2007. 52, 1. 406–422.
- 698 *Sinnott-Armstrong Nasa, Tanigawa Yosuke, Amar David, Mars Nina J, Aguirre Matthew,*  
699 *Venkataraman Guhan Ram, Wainberg Michael, Ollila Hanna M, Pirruccello James P, Qian*  
700 *Junyang, others .* Genetics of 38 blood and urine biomarkers in the UK Biobank // BioRxiv.  
701 2019. 660506.
- 702 *Tanigawa Yosuke, Li Jiehan, Justesen Johanne M, Horn Heiko, Aguirre Matthew, DeBoever*  
703 *Christopher, Chang Chris, Narasimhan Balasubramanian, Lage Kasper, Hastie Trevor, others*  
704 *.* Components of genetic associations across 2,138 phenotypes in the UK Biobank highlight  
705 *adipocyte biology // Nature communications.* 2019. 10, 1. 1–14.
- 706 *Tibshirani Robert.* Regression Shrinkage and Selection via the Lasso // Journal of the Royal  
707 *Statistical Society. Series B (Methodological).* 1996. 58, 1. 267–288.
- 708 *Tibshirani Robert, Bien Jacob, Friedman Jerome, Hastie Trevor, Simon Noah, Taylor Jonathan,*  
709 *Tibshirani Ryan J.* Strong Rules for Discarding Predictors in Lasso-Type Problems // Journal  
710 *of the Royal Statistical Society. Series B (Statistical Methodology).* 2012. 74, 2. 245–266.
- 711 *Turlach Berwin A, Venables William N, Wright Stephen J.* Simultaneous variable selection //  
712 *Technometrics.* 2005. 47, 3. 349–363.
- 713 *Velu Raja, Reinsel Gregory C.* Multivariate reduced-rank regression: theory and applications. 136.  
714 2013.
- 715 Algorithms for the Weighted Orthogonal Procrustes Problem and other Least Squares Problems.  
716 // . 2006.
- 717 *Visscher Peter M., Wray Naomi R., Zhang Qian, Sklar Pamela, McCarthy Mark I., Brown*  
718 *Matthew A., Yang Jian.* 10 Years of GWAS Discovery: Biology, Function, and Translation  
719 // The American Journal of Human Genetics. 2017. 101, 1. 5–22.
- 720 *Wainwright Martin J.* Sharp thresholds for High-Dimensional and noisy sparsity recovery using  
721  $\ell_1$ -Constrained Quadratic Programming (Lasso) // IEEE transactions on information theory.  
722 2009. 55, 5. 2183–2202.
- 723 *Xiao Lin.* Dual Averaging Methods for Regularized Stochastic Learning and Online Optimization  
724 // Journal of Machine Learning Research. 2010. 11, Oct. 2543–2596.
- 725 *Yuan Ming, Lin Yi.* Model selection and estimation in regression with grouped variables // Journal  
726 *of the Royal Statistical Society: Series B (Statistical Methodology).* 2006. 68, 1. 49–67.

727 *Zaharia Matei, Chowdhury Mosharaf, Franklin Michael J., Shenker Scott, Stoica Ion. Spark: Cluster Computing with Working Sets // Proceedings of the 2Nd USENIX Conference on Hot Topics*  
728 *in Cloud Computing. Berkeley, CA, USA: USENIX Association, 2010. 10–10. (HotCloud’10).*  
729

730 *Zhao Peng, Yu Bin. On Model Selection Consistency of Lasso // J. Mach. Learn. Res. XII 2006.*  
731 *7. 2541?2563.*

732 *Zou Hui, Hastie Trevor. Regularization and variable selection via the elastic net // Journal of the*  
733 *Royal Statistical Society: Series B (Statistical Methodology). 2005. 67, 2. 301–320.*

## 734 A Additional Proofs

### 735 A.1 Proof of Lemma 1

736 This is intuitively the same as one without the rank constraint because when the coefficients just  
 737 start to become nonzero, the coefficient matrix is low-rank in its nature. Therefore, for the purpose  
 738 of finding the maximum meaningful  $\lambda$ , we can ignore the rank constraint unless  $r = 0$ . Without the  
 739 constraint, it follows from the KKT condition that having all coefficients to be zero is equivalent  
 740 to setting

$$\lambda \geq \lambda_{\max} = \max_{1 \leq j \leq p} \|\mathbf{x}_j^\top \mathbf{Y}\|_2. \quad (14)$$

741 Therefore, the maximum  $\lambda$  that accommodates a nontrivial solution is  $\lambda_{\max} = \max_{1 \leq j \leq p} \|\mathbf{x}_j^\top \mathbf{Y}\|_2$ .

### 742 A.2 Proof of Lemma 2

743 We plug in the SVD of  $\mathbf{Z}$  and have  $\text{Tr}(\mathbf{Z}^\top \mathbf{V}) = \text{Tr}(\mathbf{N} \mathbf{D} \mathbf{M}^\top \mathbf{V}) = \text{Tr}(\mathbf{D} \mathbf{M}^\top \mathbf{V} \mathbf{N}) = \sum_{k=1}^r \mathbf{D}_{kk} \mathbf{S}_{kk}$ ,  
 744 where  $\mathbf{S} = \mathbf{M}^\top \mathbf{V} \mathbf{N}$  and the last equality is due to the fact that  $\mathbf{D}$  is a diagonal matrix. Notice that  
 745 by the skinny SVD,  $\mathbf{S} \mathbf{S}^\top = \mathbf{M}^\top \mathbf{V}^\top \mathbf{N} \mathbf{N}^\top \mathbf{V} \mathbf{M} = \mathbf{I}$ . We thus know  $\mathbf{S}$  is an orthogonal matrix and the  
 746 magnitude of its diagonal elements cannot exceed 1. Since  $\mathbf{D}_{kk}$  are all non-negative. To maximize  
 747  $\sum_{k=1}^r \mathbf{D}_{kk} \mathbf{S}_{kk}$ , we let  $\mathbf{S}_{kk} = 1$  for all  $1 \leq k \leq r$ . This is equivalent to setting  $\mathbf{S} = \mathbf{M}^\top \mathbf{V} \mathbf{N} = \mathbf{I}$ .  
 748 Therefore, one solution is given by  $\mathbf{V} = \mathbf{M} \mathbf{N}^\top$ . The maximum value of the objective is thus  
 749  $\sum_{k=1}^r \mathbf{D}_{kk} = \|\mathbf{Z}\|_*$ , the nuclear norm of  $\mathbf{Z}$ .

### 750 A.3 Proof of Theorem 2

We notice that in Problem (3) we can solve explicitly for  $\mathbf{V}$  and plug back into the objective function. It yields the objective function (after dropping the constant term  $(1/2)\|\mathbf{Y}\|_F^2$ ):

$$F_\lambda(\mathbf{U}) = \frac{1}{2} \|\mathbf{X}\mathbf{U}\|_2^2 - \|\mathbf{Y}^\top \mathbf{X}\mathbf{U}\|_* + \lambda \sum_{j=1}^p \|\mathbf{U}_j\|_2,$$

We let  $f_\lambda(\mathbf{U}) = (1/2)\|\mathbf{X}\mathbf{U}\|_2^2 - \|\mathbf{Y}^\top \mathbf{X}\mathbf{U}\|_*$  without the penalty term so that  $F_\lambda(\mathbf{U}) = f_\lambda(\mathbf{U}) + \lambda \sum_{j=1}^p \|\mathbf{U}_j\|_2$ . Define a local smooth approximation of  $F_\lambda$  as

$$\tilde{F}_\lambda^t(\mathbf{U}'; \mathbf{U}) = f_\lambda(\mathbf{U}) + \langle \nabla f_\lambda(\mathbf{U}), \mathbf{U}' - \mathbf{U} \rangle + (1/2t) \|\mathbf{U}' - \mathbf{U}\|_F^2 + \lambda \sum_{j=1}^p \|\mathbf{U}_j\|_2,$$

751 and  $\mathbf{U}^+ = \text{argmin}_{\mathbf{U}'} [\tilde{F}_\lambda^t(\mathbf{U}'; \mathbf{U}) - F_\lambda(\mathbf{U})]$ . Dubois et al. (2019) showed that if  $t$  is small enough  
 752 such that  $\tilde{F}_\lambda^t(\mathbf{U}^+; \mathbf{U}) \geq F_\lambda(\mathbf{U}^+)$ , we have

$$F_\lambda(\mathbf{U}^+) - F_\lambda^* \leq \left(1 - \min\left(\frac{1}{2}, \mu t\right)\right) (F_\lambda(\mathbf{U}) - F_\lambda^*). \quad (15)$$



753 Consider the iterates  $(\mathbf{U}^k, \mathbf{V}^k)_{k \geq 1}$  in the alternating minimization algorithm. Notice that  $\nabla f_\lambda(\mathbf{U}^k) =$   
 754  $\mathbf{X}^\top \mathbf{X} \mathbf{U}^k - \mathbf{X}^\top \mathbf{Y} \mathbf{V}^k$ . We have

$$\begin{aligned}
 F_\lambda(\mathbf{U}^{k+1}) &= g(\mathbf{U}^{k+1}, \mathbf{V}^{k+1}) - \frac{1}{2} \|\mathbf{Y}\|_F^2 \quad (g \text{ is the SRRR objective function}) \\
 &\leq g(\mathbf{U}^{k+1}, \mathbf{V}^k) - \frac{1}{2} \|\mathbf{Y}\|_F^2 \\
 &= \min_{\mathbf{U}} g(\mathbf{U}, \mathbf{V}^k) - \frac{1}{2} \|\mathbf{Y}\|_F^2 \\
 &= \min_{\mathbf{U}} \left( \frac{1}{2} \|\mathbf{Y} - \mathbf{X} \mathbf{U}^k (\mathbf{V}^k)^\top\|_F^2 + \langle \mathbf{X}^\top (\mathbf{X} \mathbf{U}^k - \mathbf{Y} \mathbf{V}^k), \mathbf{U} - \mathbf{U}^k \rangle + \right. \\
 &\quad \left. \frac{1}{2} \text{Tr}((\mathbf{U} - \mathbf{U}^k)^\top \mathbf{X}^\top \mathbf{X} (\mathbf{U} - \mathbf{U}^k)) \right) + \lambda \sum_{j=1}^p \|\mathbf{U}_{j \cdot}\|_2 - \frac{1}{2} \|\mathbf{Y}\|_F^2 \\
 &\leq \min_{\mathbf{U}} \left( f_\lambda(\mathbf{U}^k) + \langle \nabla f_\lambda(\mathbf{U}), \mathbf{U}' - \mathbf{U} \rangle + \frac{1}{2} \sigma_{\max}^2 \|\mathbf{U} - \mathbf{U}^k\|_F^2 \right) + \lambda \sum_{j=1}^p \|\mathbf{U}_{j \cdot}\|_2 \\
 &= \min_{\mathbf{U}} \tilde{F}_\lambda^{1/\sigma_{\max}^2}(\mathbf{U}; \mathbf{U}^k),
 \end{aligned}$$

755 where the fourth line is the quadratic expansion of  $g(\mathbf{U}, \mathbf{V}^k)$  at  $\mathbf{U}^k$ , the second to last is by the fact  
 756 that  $\text{Tr}((\mathbf{U} - \mathbf{U}^k)^\top \mathbf{X}^\top \mathbf{X} (\mathbf{U} - \mathbf{U}^k)) \leq \sigma_{\max}^2 \|\mathbf{U} - \mathbf{U}^k\|_F^2$ , and the last equality is by the definition  
 757 of  $\tilde{F}_\lambda^t$  function. Therefore, if we let  $\mathbf{U}^{k,+} = \text{argmin}_{\mathbf{U}} [\tilde{F}_\lambda^{1/\sigma_{\max}^2}(\mathbf{U}; \mathbf{U}^k) - F_\lambda(\mathbf{U}^k)]$ , we have

$$F_\lambda(\mathbf{U}^{k+1}) - F_\lambda^* \leq F_\lambda(\mathbf{U}^{k,+}) - F_\lambda^*. \quad (16)$$

758 We need to show that  $\mathbf{U}^{k,+}$  satisfies the condition  $\tilde{F}_\lambda^{1/\sigma_{\max}^2}(\mathbf{U}^{k,+}; \mathbf{U}^k) \geq F_\lambda(\mathbf{U}^{k,+})$ . To see this,  
 759 notice that in fact for any  $\mathbf{U}$ ,

$$\begin{aligned}
 \frac{1}{2} \|\mathbf{X} \mathbf{U}\|_2^2 &= \frac{1}{2} \|\mathbf{X} \mathbf{U}^k\|_F^2 + \langle \mathbf{X}^\top \mathbf{X} \mathbf{U}^k, \mathbf{U} - \mathbf{U}^k \rangle + \frac{1}{2} \|\mathbf{X} (\mathbf{U} - \mathbf{U}^k)\|_F^2 \\
 &\leq \frac{1}{2} \|\mathbf{X} \mathbf{U}^k\|_F^2 + \langle \mathbf{X}^\top \mathbf{X} \mathbf{U}^k, \mathbf{U} - \mathbf{U}^k \rangle + \frac{1}{2} \sigma_{\max}^2 \|\mathbf{U} - \mathbf{U}^k\|_F^2.
 \end{aligned}$$

Since  $\mathbf{X}^\top \mathbf{Y} \mathbf{V}^k$  is a subgradient of  $\|\mathbf{Y}^\top \mathbf{X} \mathbf{U}\|_*$  at  $\mathbf{U}^k$ , we have

$$-\|\mathbf{Y}^\top \mathbf{X} \mathbf{U}\|_* \leq -\|\mathbf{Y}^\top \mathbf{X} \mathbf{U}^k\|_* - \langle \mathbf{X}^\top \mathbf{Y} \mathbf{V}^k, \mathbf{U} - \mathbf{U}^k \rangle.$$

Adding the two inequalities up, and we have  $F_\lambda(\mathbf{U}) \leq \tilde{F}_\lambda^{1/\sigma_{\max}^2}(\mathbf{U}; \mathbf{U}^k)$  for all  $\mathbf{U}$ . In particular, it  
 holds for  $\mathbf{U}^{k,+}$ . Therefore, by (15) and (16), we have

$$F_\lambda(\mathbf{U}^{k+1}) - F_\lambda^* \leq F_\lambda(\mathbf{U}^{k,+}) - F_\lambda^* \leq \left( 1 - \min \left( \frac{1}{2}, \frac{\mu}{\sigma_{\max}^2} \right) \right) (F_\lambda(\mathbf{U}^k) - F_\lambda^*),$$

760 and the convergence is linear.

## 761 B Connection with CCA

762 Canonical Correlation Analysis (CCA) has an internal connection with Reduced-Rank Regression  
 763 (RRR). In particular, it can be shown that the low-rank components constructed on the  $\mathbf{X}$  space

764 turn out to be the same by a relaxed CCA and a generalized RRR. CCA finds linear combinations  
 765  $\mathbf{XU} \in \mathbb{R}^{n \times r}$  of variables in  $\mathbf{X} \in \mathbb{R}^{n \times p}$  and linear combinations  $\mathbf{YV} \in \mathbb{R}^{n \times r}$  of variables in  $\mathbf{Y} \in \mathbb{R}^{n \times q}$   
 766 that attain the maximum correlation. We assume both  $\mathbf{X}$  and  $\mathbf{Y}$  have been centered. CCA solves  
 767 the following optimization problem:

$$\begin{aligned} & \underset{\mathbf{U}, \mathbf{V}}{\text{maximize}} && \text{Tr}(\mathbf{U}^\top \mathbf{X}^\top \mathbf{Y} \mathbf{V}), \\ & \text{s.t.} && \mathbf{U}^\top \mathbf{X}^\top \mathbf{X} \mathbf{U} = \mathbf{V}^\top \mathbf{Y}^\top \mathbf{Y} \mathbf{V} = \mathbf{I}_r. \end{aligned} \quad (17)$$

768 In particular, in the one dimensional case, this reduces to the problem of maximizing our familiar  
 769 correlation coefficient. An equivalent representation to (17) can be written as

$$\begin{aligned} & \underset{\mathbf{U}, \mathbf{V}}{\text{minimize}} && \|\mathbf{YV} - \mathbf{XU}\|_F^2, \\ & \text{s.t.} && \mathbf{U}^\top \mathbf{X}^\top \mathbf{X} \mathbf{U} = \mathbf{V}^\top \mathbf{Y}^\top \mathbf{Y} \mathbf{V} = \mathbf{I}_r. \end{aligned} \quad (18)$$

770 The solution to the problem is  $\hat{\mathbf{U}} = \mathbf{S}_{xx}^{-1/2} \mathbf{Q}^{(r)}$ ,  $\hat{\mathbf{V}} = \mathbf{S}_{yy}^{-1/2} \mathbf{P}^{(r)}$  where  $\mathbf{P}^{(r)}$  and  $\mathbf{Q}^{(r)}$  are the  $r$   
 771 leading left and right singular vectors of matrix  $\mathbf{R} = \mathbf{S}_{yy}^{-1/2} \mathbf{S}_{yx} \mathbf{S}_{xx}^{-1/2}$ .  $\mathbf{P}^{(r)}$  is also the  $r$  leading  
 772 eigenvectors of  $\mathbf{S}_{yy}^{-1/2} \mathbf{S}_{yx} \mathbf{S}_{xx}^{-1} \mathbf{S}_{xy} \mathbf{S}_{yy}^{-1/2}$ . A relaxed form of CCA problem ignoring the  $\mathbf{U}$ -constraint  
 773 solves

$$\begin{aligned} & \underset{\mathbf{U}, \mathbf{V}}{\text{minimize}} && \|\mathbf{YV} - \mathbf{XU}\|_F^2, \\ & \text{s.t.} && \mathbf{V}^\top \mathbf{Y}^\top \mathbf{Y} \mathbf{V} = \mathbf{I}_r. \end{aligned} \quad (19)$$

774 The solution is  $\hat{\mathbf{U}} = \mathbf{S}_{xx}^{-1} \mathbf{S}_{xy} \mathbf{S}_{yy}^{-1/2} \mathbf{P}^{(r)}$ ,  $\hat{\mathbf{V}} = \mathbf{S}_{yy}^{-1/2} \mathbf{P}^{(r)}$ , where  $\mathbf{P}^{(r)}$  is the  $r$  leading eigenvectors  
 775 of  $\mathbf{S}_{yy}^{-1/2} \mathbf{S}_{yx} \mathbf{S}_{xx}^{-1} \mathbf{S}_{xy} \mathbf{S}_{yy}^{-1/2}$ . Therefore, the solution for  $\mathbf{V}$  remains unchanged, though  $\mathbf{U}$  is different  
 776 due to the constraint.

777 On the other hand, in the (generalized) reduced rank regression, given a given positive-definite  
 778 matrix  $\Gamma$ , the problem becomes

$$\underset{\mathbf{U}, \mathbf{V}}{\text{minimize}} \quad \text{Tr}(\Gamma^{1/2} (\mathbf{Y} - \mathbf{XUV}^\top)^\top (\mathbf{Y} - \mathbf{XUV}^\top) \Gamma^{1/2}). \quad (20)$$

779 This can be derived, for example, as an maximum likelihood estimator under the Gaussian assump-  
 780 tion with known covariance  $\Gamma^{-1}$ . One solution (Velu, Reinsel, 2013) is given by

$$\begin{aligned} \hat{\mathbf{U}} &= \mathbf{S}_{xx}^{-1} \mathbf{S}_{xy} \Gamma^{1/2} \mathbf{P}^{(r)}, \\ \hat{\mathbf{V}} &= \Gamma^{-1/2} \mathbf{P}^{(r)}, \end{aligned}$$

781 where  $\mathbf{P}^{(r)}$  is the leading eigenvectors of  $\mathbf{R} = \Gamma^{1/2} \mathbf{S}_{yx} \mathbf{S}_{xx}^{-1} \mathbf{S}_{xy} \Gamma^{1/2}$ . We see that the solution when  
 782  $\Gamma = \mathbf{S}_{yy}^{-1}$  is closely related to the relaxed CCA solution.  $\mathbf{U}$  is the same while  $\mathbf{V}$  is the so-called  
 783 reflexive inverse of  $\mathbf{V}$  there.

## 784 C Additional Experiments

785 We conduct some experiments to gain more insight into the method and compare with other meth-  
 786 ods. We generate the  $\mathbf{X} \in \mathbb{R}^{n \times p}$  with independent samples from some multivariate Gaussian

787  $\mathcal{N}(0, \Sigma_X)$ . For the first several cases, we generate the response from the true, most favorable model  
 788  $\mathbf{Y} = \mathbf{X}\mathbf{U}\mathbf{V}^\top + \mathbf{E}$ , where each entry in the support of  $\mathbf{U} \in \mathbb{R}^{p \times r}$  (sparsity  $k$ ) is independently drawn  
 789 from a standard Gaussian distribution, and  $\mathbf{V} \in \mathbb{R}^{q \times r}$  takes the left singular matrix of a Gaussian  
 790 ensemble. Hence  $\mathbf{B} = \mathbf{U}\mathbf{V}^\top$  is the true coefficient matrix. The noise matrix is generated from  
 791  $\mathcal{N}(0, \sigma_e^2 \Sigma_E)$ , where  $\sigma_e^2$  is chosen such that the signal-to-noise ratio

$$\text{SNR} = \frac{\text{Tr}(\mathbf{B}^\top \Sigma_X \mathbf{B})}{\sigma_e^2 \cdot \text{Tr}(\Sigma_E)} \quad (21)$$

is set to a given level. The performance is evaluated by the test  $R^2$ , defined as follows:

$$R^2 = 1 - \frac{\|\mathbf{Y} - \mathbf{X}\hat{\mathbf{B}}\|_F^2}{\|\mathbf{Y} - \bar{\mathbf{Y}}\|_F^2}.$$

792 We consider several sets of experiments.

- 793 1. **Scenario 1-9** Small experiments:  $(n, p, k) = (200, 100, 20), (200, 500, 20), (200, 500, 50)$ ,  $q =$   
 794  $20, r = 3$ . The  $X$  has independent design, and the noise across different responses are all  
 795 independent, i.e.  $\Sigma_X = \mathbf{I}_p, \Sigma_E = \mathbf{I}_q$ . Target SNR = 0.5, 1, 3. The results are evaluated on  
 796 test sets of size 5000.
- 797 2. **Scenario 10-18** Same as Scenario 1-9. The true coefficient matrix is no longer exact low  
 798 rank. It is perturbed by Gaussian noise with mean 0 and standard deviation 0.5.
3. **Scenario 19-27** Same as Scenario 1-9, except that the predictors are correlated. In particular,

$$\text{Cov}(\mathbf{x}_j, \mathbf{x}_{j'}) = \begin{cases} 1, & j = j', \\ \rho, & j \neq j'. \end{cases}$$

799 We let  $\rho = 0.5$  in this set of simulation.

- 800 4. **Scenario 28-36** Same as Scenario 10-18, except that the predictors are correlated as in  
 801 Scenario 19-27.

802 From the simulations, we find that underestimating the rank can degrade the performance instantly.  
 803 Overestimating the rank will give one a variance penalty, but it seems to be rather robust compared  
 804 with the other direction.

805 **Scenario 1-9** Small experiments:  $(n, p, k) = (200, 100, 20), (200, 500, 20), (200, 500, 50), q = 20, r =$   
 806 **3.** The  $\mathbf{X}$  has independent design, and the noise across different responses are all independent, i.e.  
 807  $\Sigma_X = \mathbf{I}_p, \Sigma_E = \mathbf{I}_q$ . Target SNR = 0.5, 1, 3. The results are evaluated on test sets of size 5000.

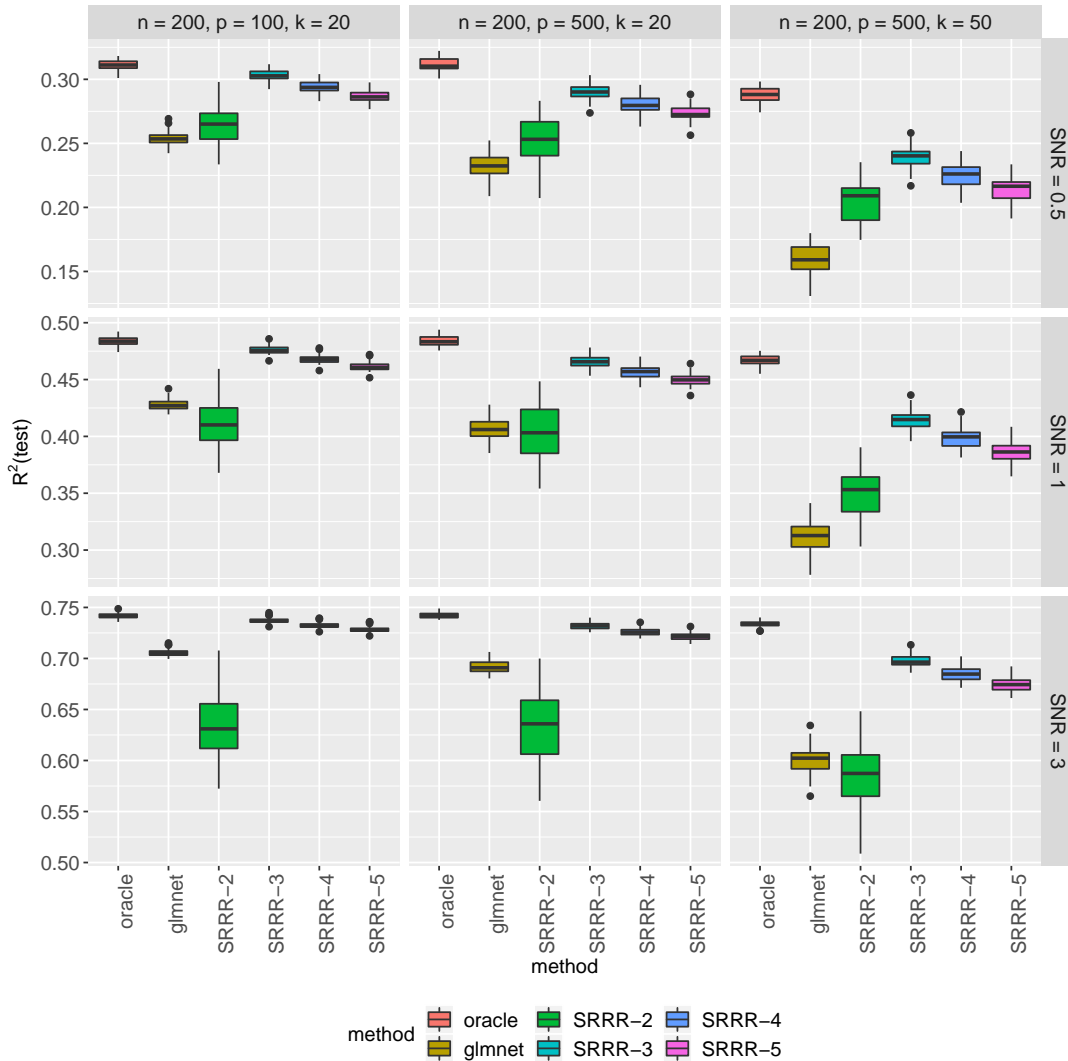

**Figure C.1:** Scenario 1-9.  $R^2$  each run is evaluated on a test set of size 5000.

808 **Scenario 10-18** Same as Scenario 1-9. The true coefficient matrix is no longer exact low rank.  
 809 It is perturbed by Gaussian noise with mean 0 and standard deviation 0.5.

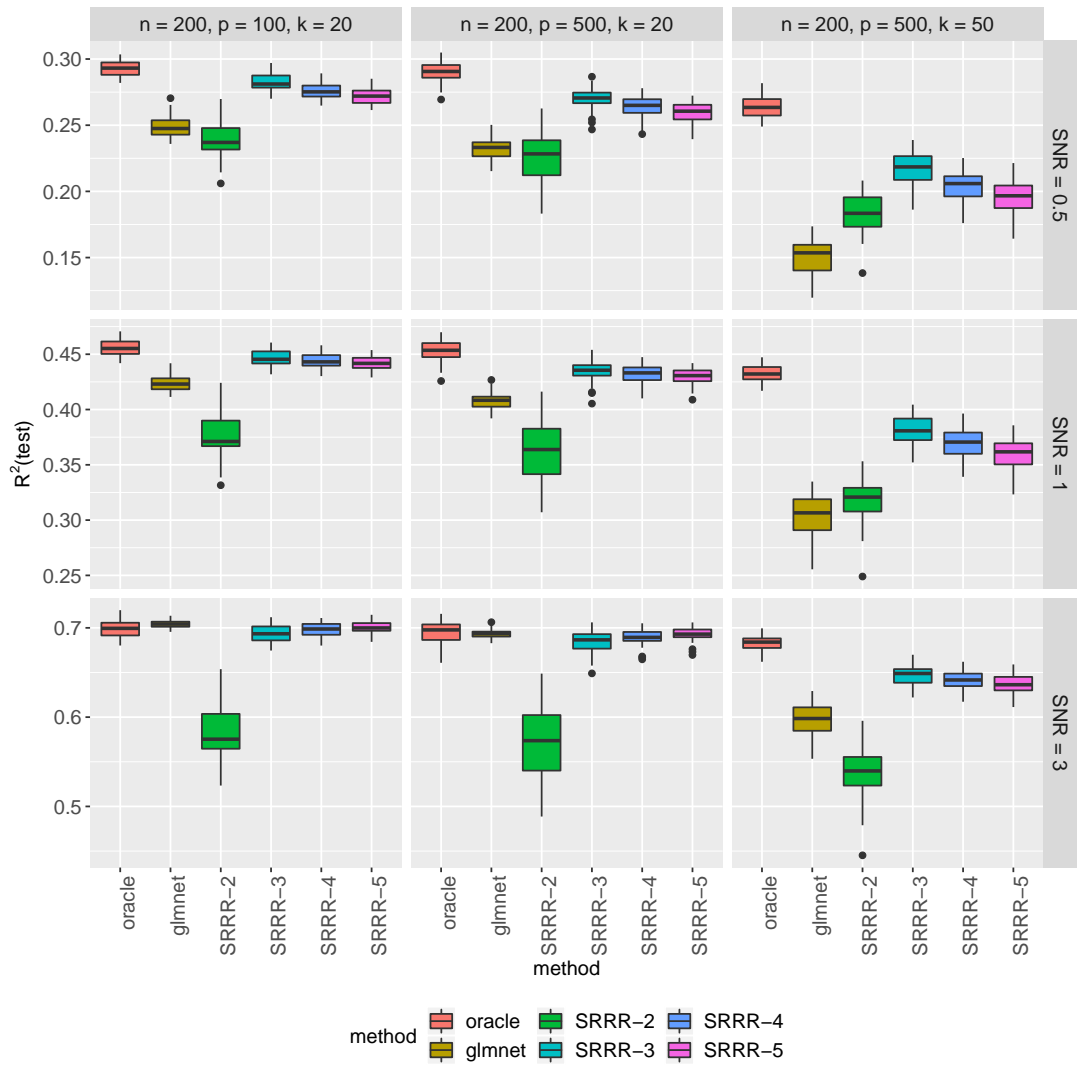

**Figure C.2:** Scenario 10-18.  $R^2$  each run is evaluated on a test set of size 5000. The oracle here does not take into account the noise in true coefficient matrix, and do reduced rank regression on the true support and the true rank.

**Scenario 19-27** Same as Scenario 1-9, except that the predictors are correlated. In particular,

$$\text{Cov}(\mathbf{x}_j, \mathbf{x}_{j'}) = \begin{cases} 1, & j = j', \\ \rho, & j \neq j'. \end{cases}$$

810 We let  $\rho = 0.5$  in this set of simulation.

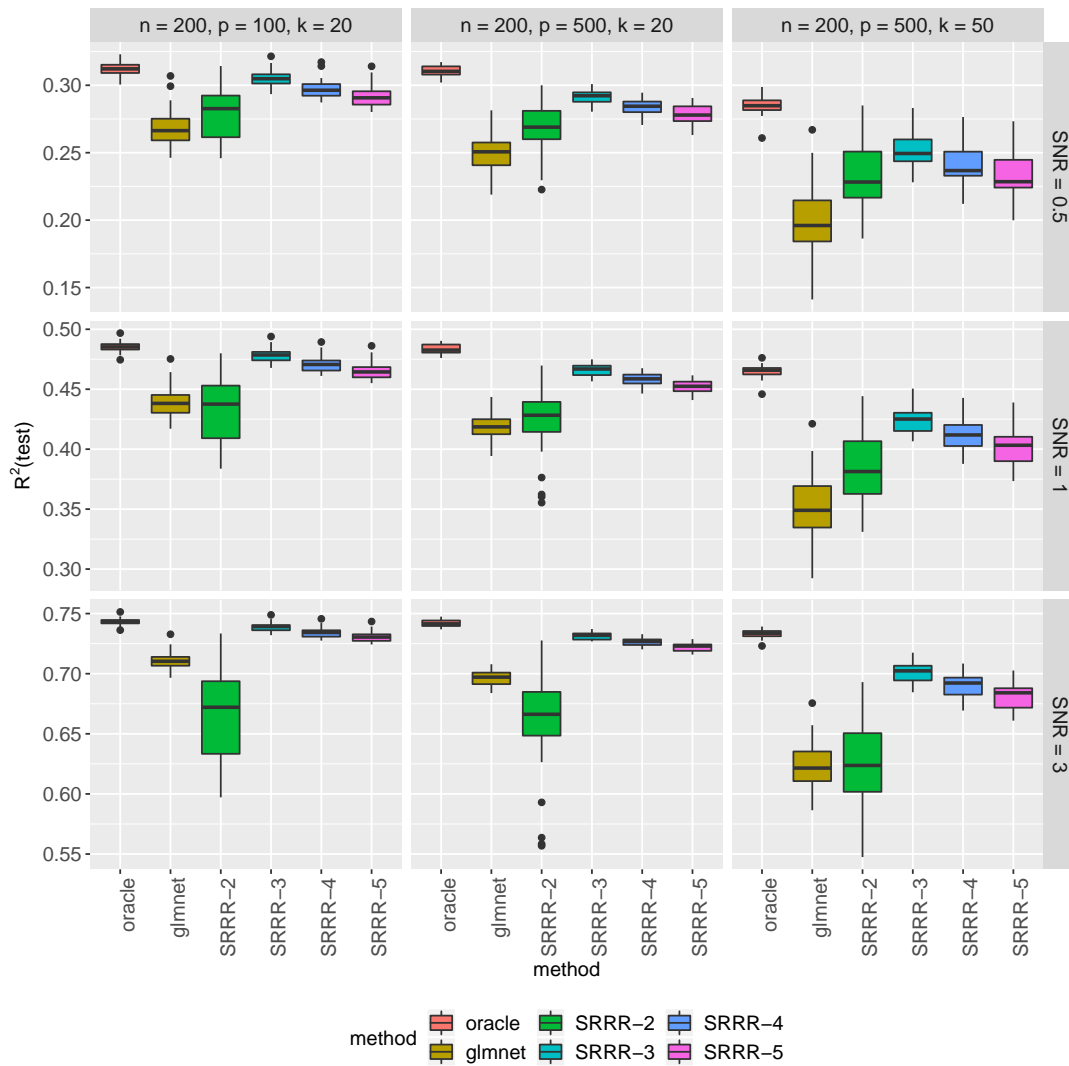

**Figure C.3:** Scenario 19-27.  $R^2$  each run is evaluated on a test set of size 5000.

811 **Scenario 28-36** Same as Scenario 10-18, except that the predictors are correlated as in Scenario  
 812 19-27.

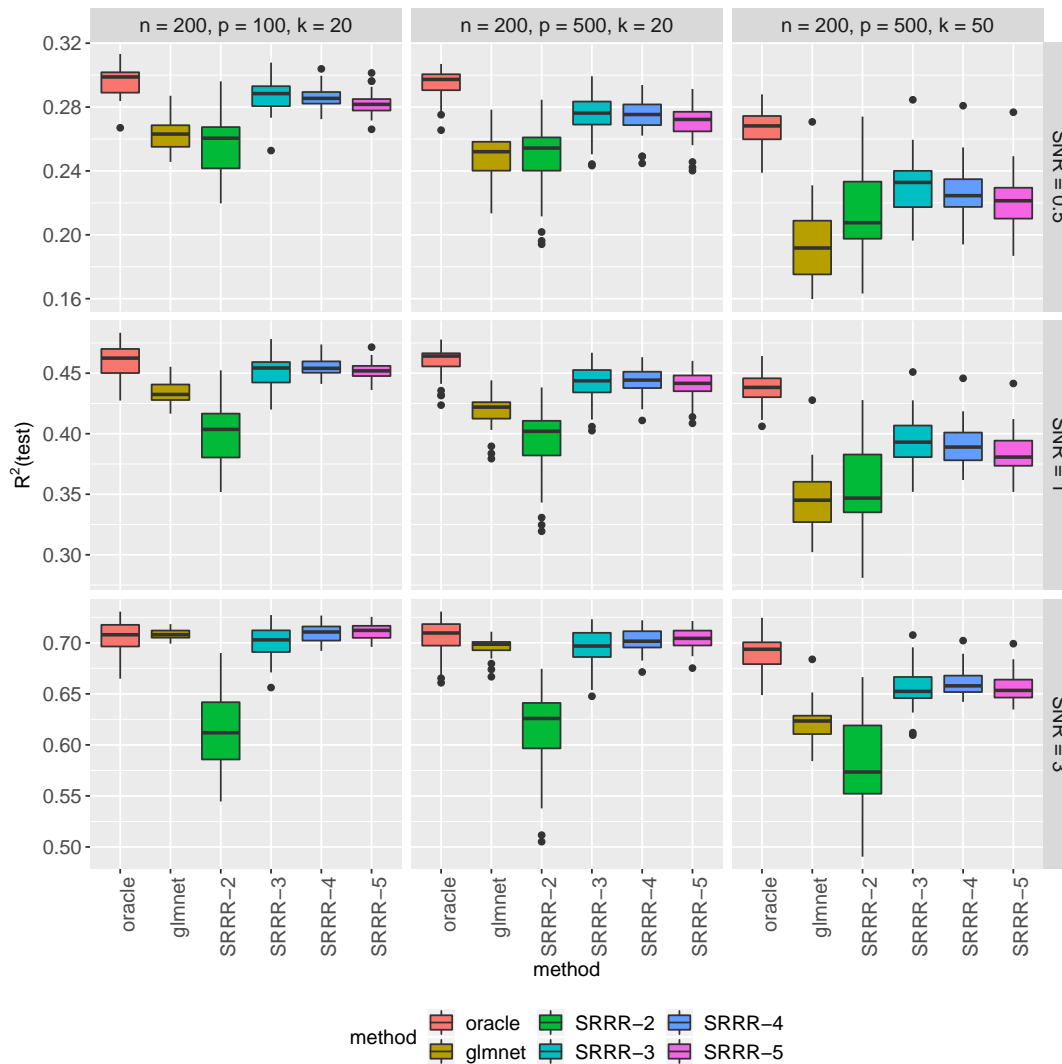

Figure C.4: Scenario 28-36.  $R^2$  each run is evaluated on a test set of size 5000.

## 813 D Additional Information on the Methods

### 814 D.1 Compliance with ethical regulations and informed consent

815 This research has been conducted using the UK Biobank Resource under Application Number  
 816 24983, “Generating effective therapeutic hypotheses from genomic and hospital linkage data” (<http://www.ukbiobank.ac.uk/wp-content/uploads/2017/06/24983-Dr-Manuel-Rivas.pdf>). Based  
 817

818 on the information provided in Protocol 44532 the Stanford IRB has determined that the research  
819 does not involve human subjects as defined in 45 CFR 46.102(f) or 21 CFR 50.3(g). All participants  
820 of UK Biobank provided written informed consent (more information is available at [https://www.  
821 ukbiobank.ac.uk/2018/02/gdpr/](https://www.ukbiobank.ac.uk/2018/02/gdpr/)).

## 822 D.2 Population stratification in UK Biobank

823 We used genotype data from the UK Biobank dataset release version 2 and the hg19 human genome  
824 reference for all analyses in the study. To minimize the variabilities due to population structure in  
825 our dataset, we restricted our analyses to include 337,151 White British individuals (Figure D.1)  
826 based on the following five criteria (DeBoever et al., 2018; Tanigawa et al., 2019) reported by the  
827 UK Biobank in the file “ukb\_sqc.v2.txt”:

- 828 1. self- reported white British ancestry (“in\_white\_British\_ancestry\_subset” column)
- 829 2. used to compute principal components (“used\_in\_pca\_calculation” column)
- 830 3. not marked as outliers for heterozygosity and missing rates (“het\_missing\_outliers” column)
- 831 4. do not show putative sex chromosome aneuploidy (“putative\_sex\_chromosome\_aneuploidy”  
832 column)
- 833 5. have at most 10 putative third-degree relatives (“excess\_relatives” column).

## 834 D.3 Variant annotation and quality control

835 We prepared a genotype dataset by combining the directly-genotype variants, copy number variants  
836 (CNVs) and HLA allelotype datasets.

837 We annotated the directly-genotyped variants using the VEP LOFTEE plugin ([https://github.  
838 com/konradjk/loftee](https://github.com/konradjk/loftee)) and variant quality control by comparing allele frequencies in the UK  
839 Biobank and gnomAD (gnomad.exomes.r2.0.1.sites.vcf.gz) as previously described<sup>28</sup>. We focused  
840 on variants outside of the major histocompatibility complex (MHC) region (chr6:25477797-36448354)  
841 as previously described. We focused on the variants according to the following criteria:

- 842 • Missigness of the variant is less than 1%, considering that two genotyping arrays (the UK  
843 BiLEVE array and the UK Biobank array) which covers a slightly different set of variants.
- 844 • Minor-allele frequency is greater than 0.01%, given the recent reports casting questions on  
845 the reliability of ultra low-frequency variants.
- 846 • The variant is in the LD-pruned set
- 847 • Hardy-Weinberg disequilibrium test p-value is less than  $1.0 \times 10^{-7}$
- 848 • Manual cluster plot inspection. We investigated the cluster plots for subset of variants and  
849 removed 11 variants that have unreliable genotype calls.
- 850 • Passed the comparison of minor allele frequency with gnomAD dataset as described before



851 CNVs were called by applying PennCNV v1.0.4 on raw signal intensity data from each array  
852 within each genotyping batch as previously described. We applied a filter on minor-allele frequency  
853 (MAF > 0.01%), which resulted in 8,274 non-rare (MAF > 0.01%) CNVs.

854 The HLA data from the UK Biobank contains all HLA loci (one line per person) in a specific  
855 order (A, B, C, DRB5, DRB4, DRB3, DRB1, DQB1, DQA1, DPB1, DPA1). We downloaded these  
856 values, which were imputed via the HLA:IMP\*2 program (Resource 182); the UK Biobank reports  
857 one value per imputed allele, and only the best-guess alleles are reported. Out of the 362 alleles  
858 reported in UKB, we used 175 alleles that were present in >0.1% of the population surveyed.

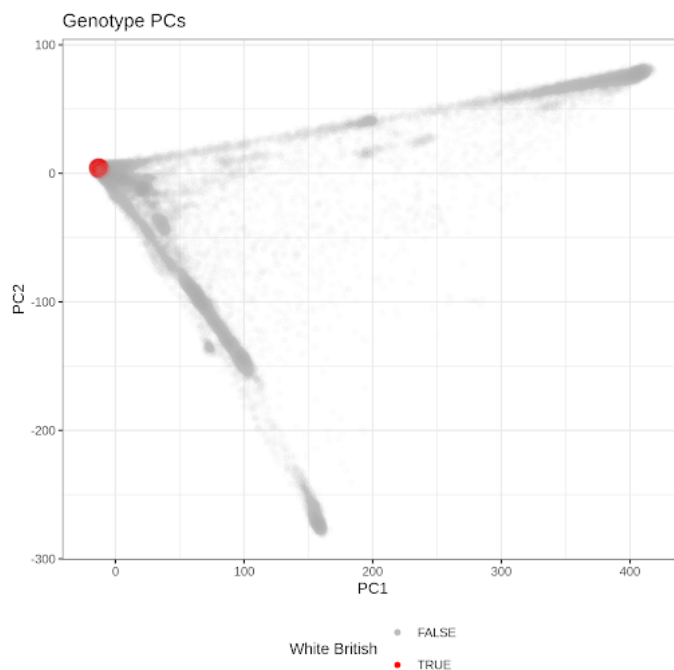

**Figure D.1:** The identification of unrelated White British individuals in UK Biobank. The first two genotype principal components (PCs) are shown on the x- and y-axis and the identified unrelated White British individuals (Methods) are shown in red.
